# Supplementary material for: An ecological model of drug and alcohol use and related harms among Aboriginal and Torres Strait Islander Australians: A systematic review of the literature
Source: PubMed Central journal article supplement — Prev Med Rep. 2020 Dec 1;21:101277. doi: 10.1016/j.pmedr.2020.101277 (PMC7773534; doi:10.1016/j.pmedr.2020.101277), 2020-12-01

## **Supplementary results for**

### **An ecological model of drug and alcohol use and related harms among Aboriginal and Torres Strait Islander Australians: a systematic review of the literature**

Mieke Snijder<sup>1</sup>, Briana Lees<sup>2</sup>, Annalee Stearne<sup>3</sup>, James Ward<sup>4 5</sup>, Sophia Garlick Bock<sup>2</sup>, Nicola Newton<sup>2</sup>, Lexine Stapinski<sup>2\*</sup>

<sup>1</sup> The Institute of Development Studies, The University of Sussex, Brighton, BN1 9RE, United Kingdom

<sup>2</sup> The Matilda Centre for Research in Mental Health and Substance Use, School of Medicine, Medicine and Health, Sydney, 2006, The University of Sydney, Australia

<sup>3</sup> Curtin University, Perth, 6102, Western Australia, Australia

<sup>4</sup> South Australia Health and Medical Research Institute, Adelaide, 5000 South Australia, Australia

<sup>5</sup> Flinders University, Adelaide, 5042, South Australia, Australia

\*Corresponding author

## **Correspondence to:**

Dr Lexine Stapinski; [lexine.stapinski@sydney.edu.au](mailto:lexine.stapinski@sydney.edu.au) +61 2 8627 9039

Postal address: Level 6, G02 Jane Foss Russell, The Matilda Centre for Research in Mental Health and Substance Use, School of Medicine, Medicine and Health, The University of Sydney, Sydney, 2006, Australia

## **Supplementary Results.**

**Supplementary Table 1.** Search strategy for systematic review of risk and protective factors of substance use and related harms among Aboriginal Australians (example: Medline search)

**Supplementary Table 2.** Summary of risk and protective factors for substance use identified in the included studies (n=38<sub>a</sub>)

**Supplementary Figure 1a:** Odds ratios of age and gender associated with tobacco, alcohol cannabis and other substance use and related harms amongst Aboriginal and Torres Strait Islander people.

**Supplementary Figure 1b:** Odds ratios of mental and physical health and lifestyle factors associated with tobacco, alcohol cannabis and other substance use and related harms amongst Aboriginal and Torres Strait Islander people.

**Supplementary Figure 1c:** Odds ratios of education and employment factors associated with tobacco, alcohol cannabis and other substance use and related harms amongst Aboriginal and Torres Strait Islander people.

**Supplementary Figure 1d:** Odds ratios of other socioeconomic status factors associated with tobacco, alcohol cannabis and other substance use and related harms amongst Aboriginal and Torres Strait Islander people.

**Supplementary Figure 2:** Odds ratios of relationship factors associated with tobacco, alcohol cannabis and other substance use and related harms amongst Aboriginal and Torres Strait Islander people

**Supplementary Figure 3:** Odds ratios of community factors associated with tobacco, alcohol cannabis and other substance use and related harms amongst Aboriginal and Torres Strait Islander people.

**Supplementary Figure 4:** Odds ratios of culturally distinct and societal factors associated with tobacco and alcohol use and related harms amongst Aboriginal and Torres Strait Islander people.

**Supplementary Table 2.** Search strategy for systematic review of risk and protective factors of substance use and related harms among Aboriginal Australians (example: Medline search)

|                                                                                                                                                                                                                     |                                                                                                                                       |
|---------------------------------------------------------------------------------------------------------------------------------------------------------------------------------------------------------------------|---------------------------------------------------------------------------------------------------------------------------------------|
| 1                                                                                                                                                                                                                   | ((Aborigin* OR "Torres Strait Islander" OR Aboriginal) and Australia).mp.                                                             |
| 2                                                                                                                                                                                                                   | ((risk OR protec* OR resilienc* OR underlying OR ecological OR vulnerab* OR psychosocial) AND (factor OR mechanism OR character*).mp. |
| 3                                                                                                                                                                                                                   | (wellbeing OR mental health OR substance OR alcohol OR drug OR tobacco).mp.                                                           |
| 4                                                                                                                                                                                                                   | limit 1 to yr="1990 - 2017"                                                                                                           |
| [mp=title, abstract, original title, name of substance word, subject heading word, keyword heading word, protocol supplementary concept word, rare disease supplementary concept word, unique identifier, synonyms] |                                                                                                                                       |

**Supplementary Table 2.** Summary of risk and protective factors for substance use identified in the included studies (n=38<sub>a</sub>)

| First author (year)        | Findings Ecological level               | Specific results                                                                                                                                                                                                                                                                                                                                                                                                                                                                                                                                                                                                                                                                                                                                                                                                                                                                                                                                                                                                                                                                                                                                                                                                                                                                                                                                                                                                              |
|----------------------------|-----------------------------------------|-------------------------------------------------------------------------------------------------------------------------------------------------------------------------------------------------------------------------------------------------------------------------------------------------------------------------------------------------------------------------------------------------------------------------------------------------------------------------------------------------------------------------------------------------------------------------------------------------------------------------------------------------------------------------------------------------------------------------------------------------------------------------------------------------------------------------------------------------------------------------------------------------------------------------------------------------------------------------------------------------------------------------------------------------------------------------------------------------------------------------------------------------------------------------------------------------------------------------------------------------------------------------------------------------------------------------------------------------------------------------------------------------------------------------------|
| <b>Quantitative (n=26)</b> |                                         |                                                                                                                                                                                                                                                                                                                                                                                                                                                                                                                                                                                                                                                                                                                                                                                                                                                                                                                                                                                                                                                                                                                                                                                                                                                                                                                                                                                                                               |
| ABS (1995)                 | Individual<br>Community                 | Males = ↑ <b>tobacco use</b> vs females (OR=1.37, CI 1.35-1.40)*; ↑ <b>alcohol use</b> vs females (OR=1.85, CI 1.82-1.88)*<br>Urban = ↑ <b>alcohol use problems in community</b> vs rural (OR=1.58, 1.54-1.63)*; capital city (OR=2.82, CI 2.75-2.89)*, urban = ↑ <b>reported cannabis use problems in community</b> vs capital city (OR=1.99, CI 1.95-2.04)*; rural (OR=2.61, CI 2.55-2.66)*, urban = ↑ <b>petrol sniffing problems in community</b> vs rural (OR=1.32, CI 1.28-1.36)*; capital city (OR=1.50, CI 1.45-1.54)*; capital city = ↑ <b>other substance use problems in community</b> vs urban (OR=1.19, CI 1.16-1.22)*; rural (OR=3.24, CI 3.14-3.34)*, capital city = ↑ <b>glue sniffing problems in community</b> vs urban (OR=1.02, CI 0.99-1.06)*; rural (OR=2.67, CI 2.57-2.79)*                                                                                                                                                                                                                                                                                                                                                                                                                                                                                                                                                                                                                            |
| ABS (1996)                 | Individual<br>Community                 | Males = ↑ <b>heavy tobacco use</b> vs females (28% vs 18%), ↑ <b>alcohol use</b> vs females (47% vs 29%); females = ↑ <b>alcohol abstinence</b> vs males (33% vs 25%)<br>20-24yrs = ↑ <b>tobacco use</b> vs 15-19yrs (60% vs 37%)<br>Urban = ↑ <b>alcohol use problems</b> vs rural (84% vs 75%), ↑ <b>cannabis use problems</b> vs rural (68% vs 42%)                                                                                                                                                                                                                                                                                                                                                                                                                                                                                                                                                                                                                                                                                                                                                                                                                                                                                                                                                                                                                                                                        |
| ABS (2004)                 | Individual                              | Completed yr9 or below = ↑ <b>alcohol use</b> vs completed yr10-11 (OR=1.14, CI 1.11-1.17)*; yr12 (OR=1.09, CI 1.07-1.12)*; non-school qualification (OR=1.38, CI 1.35-1.42)*, completed yr9 or below = ↑ <b>tobacco use</b> vs completed yr10-11 (OR=1.18, CI 1.16-1.20)*; yr12 (OR=1.95, CI 1.91-1.99)*; non-school qualification (OR=1.59, CI 1.56-1.63)*<br>Males = ↑ <b>high risk alcohol use</b> vs females (OR=1.33, CI 1.31-1.36)*; ↑ <b>tobacco use</b> (OR=1.16, CI 1.14-1.17)*<br>Males 15-24yrs = ↑ <b>tobacco use</b> vs females 15-24yrs (OR=1.03, CI 1.00-1.06)*, males 25-34yrs = ↑ <b>tobacco use</b> vs females 25-34yrs (OR=1.01, CI 0.98-1.04)*, males 35-44yrs = ↑ <b>tobacco use</b> vs females 35-44yrs (OR=1.22, 1.18-1.26)*, males 45-54yrs = ↑ <b>tobacco use</b> vs females 45-54yrs (OR=1.26, 1.21-1.31)*, males 55yrs+ = ↑ <b>tobacco use</b> vs females 55yrs+ (OR=1.85, 1.76-1.93)*; Males 15-24yrs = ↑ <b>high risk alcohol use</b> vs females 15-24yrs (OR=1.08, CI 1.04-1.13)*, males 25-34yrs = ↑ <b>high risk alcohol use</b> vs females 25-34yrs (OR=1.32, CI 1.27-1.38)*, males 35-44yrs = ↑ <b>high risk alcohol use</b> vs females 35-44yrs (OR=1.16, CI 1.11-1.20)*, males 45-54yrs = ↑ <b>high risk alcohol use</b> vs females 45-54yrs (OR=1.83, CI 1.73-1.93)*, males 55yrs+ = ↑ <b>high risk alcohol use</b> vs females 55yrs+ (OR=3.35, CI 3.12-3.60)*                          |
| ABS, AIHW (2008)           | Individual<br>Relationship<br>Community | Incomplete education = ↑ <b>tobacco use</b> vs completed yr12 (55% vs 34%)*, ↑ <b>alcohol use</b> vs yr12 (17% vs 12%)*, ↑ <b>illicit substance use</b> vs yr12 (35% vs 28%)<br>Males = ↑ <b>illicit substance use</b> vs females (54% vs 45%), ↑ <b>alcohol use (binge drinking)</b> vs females (24% vs 15%), ↑ <b>lifetime risky alcohol use</b> vs females (22% vs 8%), ↑ <b>alcohol use (chronic high risk use)</b> vs females (19% vs 14%)<br>Psychological distress in past mth = ↑ <b>tobacco use</b> , ↑ <b>chronic alcohol use</b> , ↑ <b>weekly binge drinking</b> (no statistics provided)<br>Unemployed = ↑ <b>tobacco use</b> vs employed (66% vs 45%)*, ↑ <b>high risk alcohol use</b> vs employed (20% vs 19%)<br>Alcohol use (high risk) = ↑ <b>tobacco use</b> (no statistics provided); tobacco use, aged 18-34yrs = ↑ <b>cannabis use</b> vs no tobacco use, aged 18-34yrs (46% vs 16%); tobacco use, aged 18-34, non-remote = ↑ <b>illicit substance use</b> vs no tobacco use in non-remote (no statistics provided)<br>1 <sup>st</sup> & 2 <sup>nd</sup> household income quartile = ↑ <b>tobacco use</b> vs 3rd+ quartile (55% vs 40%)*, 3rd+ quartile = ↑ <b>high risk alcohol use</b> vs 1 <sup>st</sup> & 2 <sup>nd</sup> quartile (18% vs 16%)<br>Males in remote = ↑ <b>daily tobacco use</b> vs males in non-remote (58% vs 49%); remote = ↑ <b>alcohol abstinence</b> vs non-remote (18% vs 6%) |
| ABS (2009)                 | Community                               | Remote = ↑ <b>tobacco use</b> vs living in major city (OR=1.58, CI 0.88-2.83)*, ↑ <b>alcohol abstinence</b> (12mths) vs living in major city (OR=1.85, CI 1.01-3.36)*; Regional = ↑ <b>high risk alcohol use</b> vs remote (OR=1.41, CI 0.46-4.29)*, major city (OR=1.80, CI 0.59-5.46)*                                                                                                                                                                                                                                                                                                                                                                                                                                                                                                                                                                                                                                                                                                                                                                                                                                                                                                                                                                                                                                                                                                                                      |
| ABS (2016)                 | Individual<br>Community                 | Males = ↑ <b>daily tobacco use</b> vs females (OR=1.24, CI 1.22-1.25)*, ↑ <b>single occasion risky alcohol use</b> vs females (OR=2.40, CI 2.37-2.43)*, ↑ <b>lifetime risky alcohol use</b> vs females (OR=3.31, CI 3.25-3.37)* ↑ <b>illicit substance use</b> vs females (OR=1.32, CI 1.30-1.33)*, ↑ <b>analgesic use</b> vs males (15% vs 11%); males 15-24yrs = ↑ <b>daily tobacco use</b> vs females 15-24yrs (OR=1.46, CI 1.43-1.50)*; males 45-54yrs = ↑ <b>daily tobacco use</b> vs females 45-54yrs (OR=1.47, 1.42-1.51)*; females = ↑ <b>alcohol use (&lt;1 day/yr)</b> vs males (47% vs 29%)<br>Remote = ↑ <b>daily tobacco use</b> vs non-remote (OR=1.54, CI 1.52-1.57)*, ↑ <b>single occasion risky alcohol use</b> vs non-remote (OR=1.12, CI 1.10-1.13)*, ↑ <b>lifetime risky alcohol use</b> vs non-remote (OR=1.37, CI 1.34-1.39)*; non-remote = ↑ <b>illicit substance use</b> vs remote (OR=1.90, CI 1.87-1.94)*                                                                                                                                                                                                                                                                                                                                                                                                                                                                                           |
| Brown <i>et al.</i> (2016) | Individual                              | Completed less than yr12 = ↑ <b>tobacco use</b> vs completed yr12 (OR=2.70, CI 1.05-6.94)*; diploma/degree (OR=7.74, CI 1.70-35.27)**; completed less than yr12 = ↑ <b>cannabis use</b> vs completed yr12 (OR=5.43, CI 1.51-19.50)*, certificate/traineeship (OR=1.94, CI 1.04-3.60)*, diploma/degree (OR=6.66, CI 1.45-30.50)**<br>Unemployed = ↑ <b>tobacco</b> vs employed (OR=3.31, CI 1.96-5.58)**; ↑ <b>cannabis use</b> vs employed (OR=3.43, CI 1.87-6.32)***                                                                                                                                                                                                                                                                                                                                                                                                                                                                                                                                                                                                                                                                                                                                                                                                                                                                                                                                                         |

| First author (year)                         | Findings Ecological level | Specific results                                                                                                                                                                                                                                                                                                                                                                                                                                                                                                                                                                                                                                                                                                                                                                                                                                                                                                                                                                                                                                                                                                                                                                                                                                                                                                                                                                                                                                                                                                                                                                                                                                                                                                                                                                                                                                                                                                                                                                                                                                                                                                                                                                                                                                   |
|---------------------------------------------|---------------------------|----------------------------------------------------------------------------------------------------------------------------------------------------------------------------------------------------------------------------------------------------------------------------------------------------------------------------------------------------------------------------------------------------------------------------------------------------------------------------------------------------------------------------------------------------------------------------------------------------------------------------------------------------------------------------------------------------------------------------------------------------------------------------------------------------------------------------------------------------------------------------------------------------------------------------------------------------------------------------------------------------------------------------------------------------------------------------------------------------------------------------------------------------------------------------------------------------------------------------------------------------------------------------------------------------------------------------------------------------------------------------------------------------------------------------------------------------------------------------------------------------------------------------------------------------------------------------------------------------------------------------------------------------------------------------------------------------------------------------------------------------------------------------------------------------------------------------------------------------------------------------------------------------------------------------------------------------------------------------------------------------------------------------------------------------------------------------------------------------------------------------------------------------------------------------------------------------------------------------------------------------|
|                                             | Relationship              | <p>Age of mother at birth of first child is 14-19yrs = ↑ <b>tobacco use</b> vs mother aged 20-24yrs (OR=1.76, CI 1.02-3.04)*; mother aged 25yrs+ (OR=2.92, CI 1.37-6.19)**; ↑ <b>cannabis use</b> vs mother aged 20-24yrs (OR=2.58, CI 1.35-4.94)*; mother aged 25yrs+ (OR=3.20, CI 1.35-7.63)**</p> <p>3+ stressful events and social health issues = ↑ <b>tobacco use</b> vs 1-2 stressful events and social health issues (OR=2.20, CI 1.16-4.16)*; ↑ <b>cannabis use</b> vs 0 stressful events and social health issues***; 1-2 stressful events and social health issues (OR=4.19, CI 1.81-9.70)***</p> <p>First pregnancy check-up in 2<sup>nd</sup> trimester = ↑ <b>cannabis use</b> vs first pregnancy check-up in 1<sup>st</sup> trimester (OR=3.46, CI 1.64-7.30)*</p> <p>Problems with drugs or alcohol = ↑ <b>tobacco use</b> vs no problems with drugs or alcohol (OR=5.71, CI 1.16-28.06)***; ↑ <b>cannabis use</b> vs no problems with drugs or alcohol (OR=36.17, CI 8.17-160.14)***</p> <p>Mother has 4-10 children = ↑ <b>tobacco use</b> vs mother has 1 child (OR=2.78, CI 1.43-5.39)*; mother has 2-3 children (OR=1.52, CI 0.78-2.98)*; ↑ <b>cannabis use</b> vs mother has 1 child (OR=2.67, CI 1.15-6.17)*</p> <p>Partner has problems with drugs/alcohol = ↑ <b>tobacco use</b> vs partner does not have problems with drugs/alcohol (OR=1.99, CI 1.01-3.93)*; ↑ <b>cannabis use</b> vs partner does not have problems with drugs/alcohol (OR=6.44, CI 3.21-12.90)***</p> <p>Ever been pushed, shoved or assaulted = ↑ <b>cannabis use</b> vs never been pushed, shoved or assaulted (OR=3.24, CI 1.56-6.70)**; ever scared by other people's behavior = ↑ <b>cannabis use</b> vs not scared by other people's behavior (OR=3.12, CI 1.70-5.72)***</p> <p>Upset by family arguments = ↑ <b>cannabis use</b> vs not upset by family arguments (OR=2.61, CI 1.41-4.84)**; left home because of an argument or fight = ↑ <b>cannabis use</b> vs have not left home because of an argument or fight (OR=2.25, CI 1.22-4.16)*</p> <p>Ever been pestered for money = ↑ <b>tobacco use</b> vs not pestered for money (OR=2.28, CI 1.30-4.00)***; ↑ <b>cannabis use</b> vs not pestered for money (OR=4.19, CI 2.25-7.78)***</p> |
| Clough <i>et al.</i> (2004)                 | Individual                | <p>Males = ↑ <b>lifetime cannabis use</b> vs females (OR= 7.40)***</p> <p>Cannabis use = ↑ <b>history of petrol sniffing</b> vs no cannabis use (OR= 9.10)***; ↑ <b>tobacco use</b> vs no cannabis use (OR= 19.00)***; ↑ <b>kava use</b> vs no cannabis use (OR= 0.40)*</p>                                                                                                                                                                                                                                                                                                                                                                                                                                                                                                                                                                                                                                                                                                                                                                                                                                                                                                                                                                                                                                                                                                                                                                                                                                                                                                                                                                                                                                                                                                                                                                                                                                                                                                                                                                                                                                                                                                                                                                        |
| Cunningham <i>et al.</i> (1997)             | Individual                | <p>Still attending school = ↓ <b>tobacco use</b> vs completed yr10/11 (males OR=0.19, CI=0.13-0.29)***; (females OR=0.31, CI 0.22-0.43)***; completed yr12 = ↓ <b>tobacco use</b> vs completed yr10/11 (males OR=0.37, CI 0.28-0.49)***; (females OR=0.56, CI 0.44-0.71)***</p> <p>Employed in CDEP scheme = ↑ <b>tobacco use</b> vs employed in non-CDEP (males OR=1.95, CI 1.51-2.52)***; (females OR=1.43, CI 1.04-1.97)*; unemployed = ↑ <b>tobacco use</b> vs employed in non-CDEP (males OR=1.89, CI 1.56-2.28)***; (females OR=1.63, CI 1.32-2.03)***; not in labor force = ↑ <b>tobacco use</b> vs employed in non-CDEP (males OR=1.74, CI 1.41-2.14)***; (females OR=1.69, CI 1.42-2.01)***</p> <p>Home owner/purchaser = ↓ <b>tobacco use</b> vs not a home owner/purchaser (males OR=0.40, CI 0.34-0.49)***; (females OR=0.55, CI 0.46-0.67)***; live with Aboriginal and Torres Strait Islander and non-Aboriginal people = ↑ <b>tobacco use</b> vs only live with Aboriginal and Torres Strait Islander people (males OR=1.44, CI 1.20-1.72)***</p> <p>15-24yrs = ↓ <b>tobacco use</b> vs 25-44yrs (Aboriginal males OR = 0.82, CI 0.69-0.98)*; 45yrs+ = ↓ <b>tobacco use</b> vs 25-44yrs (males OR = 0.56, CI 0.46-0.69)***; (females OR = 0.48, CI 0.40-0.58)***</p>                                                                                                                                                                                                                                                                                                                                                                                                                                                                                                                                                                                                                                                                                                                                                                                                                                                                                                                                                                |
|                                             | Community Cultural        | <p>Last drank more than 1wk ago = ↓ <b>tobacco use</b> vs drank in the past week (males OR = 0.63, CI 0.54-0.74)***; (females OR = 0.40, CI 0.34-0.47)***; never drinks alcohol = ↓ <b>tobacco use</b> vs drank in the past week (males OR = 0.20, CI 0.16-0.26)***; (females OR = 0.16, CI 0.13-0.19)***</p>                                                                                                                                                                                                                                                                                                                                                                                                                                                                                                                                                                                                                                                                                                                                                                                                                                                                                                                                                                                                                                                                                                                                                                                                                                                                                                                                                                                                                                                                                                                                                                                                                                                                                                                                                                                                                                                                                                                                      |
|                                             | Societal                  | <p>Main language is not English = ↑ <b>tobacco use</b> vs English as main language (males OR=1.31, CI 1.05-1.63)*; ↓ <b>tobacco use</b> vs English as main language (females OR=0.74, CI 0.60-0.90)**</p> <p>Urban area = ↓ <b>tobacco use</b> vs capital city (males OR = 0.78, CI 0.65-0.94)**; (females OR =0.76, CI 0.65-0.90)**; rural area = ↓ <b>tobacco use</b> vs capital city (females OR = 0.76, CI 0.63-0.93)**</p> <p>Role of Elders considered not important = ↓ <b>tobacco use</b> vs considers Elders important (males OR=0.66, CI 0.54-0.81)***; (females OR=0.81, CI 0.66-0.98)*; does not recognize homelands = ↓ <b>tobacco use</b> vs recognizes homelands (females OR=0.76, CI .64-0.98)***</p> <p>Taken away from family as child = ↑ <b>tobacco use</b> vs not taken away from family as child (males OR=1.88, CI 1.43-2.49)***; (females OR=1.37, CI 1.08-1.75)**</p>                                                                                                                                                                                                                                                                                                                                                                                                                                                                                                                                                                                                                                                                                                                                                                                                                                                                                                                                                                                                                                                                                                                                                                                                                                                                                                                                                     |
| DiGiacomo <i>et al.</i> (2007) <sup>b</sup> | Individual                | <p>↑ Stress = ↑ <b>tobacco use relapse</b> (no statistics provided)</p>                                                                                                                                                                                                                                                                                                                                                                                                                                                                                                                                                                                                                                                                                                                                                                                                                                                                                                                                                                                                                                                                                                                                                                                                                                                                                                                                                                                                                                                                                                                                                                                                                                                                                                                                                                                                                                                                                                                                                                                                                                                                                                                                                                            |
| Dingwall <i>et al.</i> (2012)               | Relationship              | <p>Married = ↑ <b>petrol abstinence</b> vs unmarried*; friend encouragement to receive treatment = ↑ <b>petrol abstinence</b>*</p>                                                                                                                                                                                                                                                                                                                                                                                                                                                                                                                                                                                                                                                                                                                                                                                                                                                                                                                                                                                                                                                                                                                                                                                                                                                                                                                                                                                                                                                                                                                                                                                                                                                                                                                                                                                                                                                                                                                                                                                                                                                                                                                 |
|                                             | Community                 | <p>↑ Number of people living in house = ↑ <b>petrol abstinence</b>*</p> <p>Remote = ↑ <b>petrol abstainer's</b> vs non-remote*</p>                                                                                                                                                                                                                                                                                                                                                                                                                                                                                                                                                                                                                                                                                                                                                                                                                                                                                                                                                                                                                                                                                                                                                                                                                                                                                                                                                                                                                                                                                                                                                                                                                                                                                                                                                                                                                                                                                                                                                                                                                                                                                                                 |

| First author (year)                      | Findings Ecological level              | Specific results                                                                                                                                                                                                                                                                                                                                                                                                                                                                                                                                                                                                                                                                                                                                                                                                                                                                                                                                                                                                                                                                                                                                                                                                             |
|------------------------------------------|----------------------------------------|------------------------------------------------------------------------------------------------------------------------------------------------------------------------------------------------------------------------------------------------------------------------------------------------------------------------------------------------------------------------------------------------------------------------------------------------------------------------------------------------------------------------------------------------------------------------------------------------------------------------------------------------------------------------------------------------------------------------------------------------------------------------------------------------------------------------------------------------------------------------------------------------------------------------------------------------------------------------------------------------------------------------------------------------------------------------------------------------------------------------------------------------------------------------------------------------------------------------------|
| Fitts <i>et al.</i> (2013)               | Individual<br>Community                | Petrol accessibility = ↑ <b>petrol sniffing relapse</b> vs limited petrol accessibility (RR= 1.70)*<br>40yrs+ = ↓ <b>repeat drink driving offences</b> vs 15-24 yrs (OR= 0.73, CI 0.57-0.91)**<br>Inner regional = ↑ <b>repeat drink driving offences</b> vs major city (OR= 1.97, CI 1.47-2.63)***; outer regional = ↑ <b>repeat drink driving offences</b> vs major city (OR= 2.10, CI 1.63-2.71)***; remote = ↑ <b>repeat drink driving offences</b> vs major city (OR= 2.53, CI 1.88-3.39)***; very remote = ↑ <b>repeat drink driving offences</b> vs major city (OR=2.71, CI 2.04-3.61)***                                                                                                                                                                                                                                                                                                                                                                                                                                                                                                                                                                                                                             |
| Fitts <i>et al.</i> (2017)               | Individual<br>Community                | Males = ↑ <b>repeat drink driving offences</b> vs females (OR= 2.35, CI 1.77-3.1)***<br>14-17yrs = ↑ <b>repeat drink driving offences</b> vs 21-24 yrs (OR= 4.44, CI 3.10-6.38)***; 18-20 years = ↑ <b>repeat drink driving offences</b> vs 21-24 yrs (OR= 2.36, CI 1.71-3.26)***<br>Inner regional = ↑ <b>repeat drink driving offences</b> vs major city (OR= 1.67, CI 1.15-2.45)**                                                                                                                                                                                                                                                                                                                                                                                                                                                                                                                                                                                                                                                                                                                                                                                                                                        |
| Gazis <i>et al.</i> (2010) <sub>b</sub>  | Relationship<br>Cultural               | Peer tobacco use = ↑ <b>tobacco use</b> vs non-user peers (OR= 1.60, CI 1.2-2.1)***; peer alcohol use = ↑ <b>alcohol use</b> vs non-user peers (OR= 1.40, CI 1.2-1.7)**; peer cannabis use = ↑ <b>cannabis use</b> vs non-user peers (OR= 1.40, CI 1.0-2.0)*<br>↑ Time spent learning about Aboriginal and Torres Strait Islander culture = ↑ <b>tobacco use</b> *; high scores for cultural participation & exploration + peer alcohol use = ↓ <b>alcohol abstinence</b> vs no peer alcohol use (OR=0.80, CI 0.7-1.0)*; high scores for cultural affirmation & belonging + peer alcohol use = ↓ <b>alcohol abstinence</b> vs no peer alcohol use (OR=0.80, CI 0.7-1.0)*; high scores for cultural participation & exploration + no peer alcohol use = ↓ <b>alcohol initiation</b> vs peer alcohol use (OR=0.80, CI 0.7-0.9)**; high scores for cultural affirmation & belonging + no peer AOD use = ↓ <b>alcohol initiation</b> vs peer alcohol use (OR=0.80, CI 0.7-0.9)**; high scores for cultural affirmation & belonging + no peer cannabis use = ↓ <b>cannabis use</b> vs no peer cannabis use (OR=-0.07, CI 0.5-1.0)*; strong MEIM scores = ↓ <b>alcohol initiation</b> vs low MEIM scores (OR= -0.90, CI 0.8-0.9)** |
| Hall <i>et al.</i> (1993)                | Individual                             | Males = ↑ <b>alcohol use</b> vs females (OR=3.17, CI 2.21-4.56)***<br>Males ≤ 40yrs = ↑ <b>alcohol use</b> vs >41yrs (OR=18.87, CI 7.28-48.85)***; females ≤ 40yrs = ↑ <b>alcohol use</b> vs >41yrs (OR=5.17, CI 2.93-9.11)*                                                                                                                                                                                                                                                                                                                                                                                                                                                                                                                                                                                                                                                                                                                                                                                                                                                                                                                                                                                                 |
| Heath <i>et al.</i> (2006)               | Individual<br>Relationship             | ↑ Boredom = ↑ <b>tobacco use</b> for 11% of sample<br>↑ Stress = ↑ <b>tobacco use</b> in 57% of sample<br>↑ Drinking alcohol = ↓ <b>tobacco cessation</b> for 8% of sample; eating a meal associated with ↑ <b>tobacco use</b> for 42% of sample<br>Family/peer tobacco use = ↑ <b>tobacco use</b> for 17% of sample                                                                                                                                                                                                                                                                                                                                                                                                                                                                                                                                                                                                                                                                                                                                                                                                                                                                                                         |
| Jacups <i>et al.</i> (2015)              | Individual<br>Relationship<br>Societal | Left school in yr7/8 = ↑ <b>cannabis use</b> vs left school in yr11/12 (OR=5.56, CI 1.37-22.59)**; left school in yr9/10 = ↑ <b>cannabis use</b> vs left school in yr11/12 (OR=3.97, CI 1.68-9.37)**; ↓ mean age left school = ↑ <b>cannabis use</b> *<br>Unemployed/boredom = ↑ <b>cannabis use</b> (33% sample); ↑ workplace outputs, retain job = ↑ <b>cannabis cessation</b> (15% sample)<br>↑ Stress (grief, physical pain) = ↑ <b>cannabis use</b> in 34% of sample<br>Health prioritization = ↑ <b>cannabis cessation</b> in 18% of sample<br>Substance dealing = ↑ <b>cannabis use</b> in 3% of sample<br>Legal problems as juvenile = ↑ <b>cannabis use</b> vs no legal problems as juvenile (OR=4.27; CI 1.71-10.66)**; incarceration, parole conditions, family services = ↑ <b>cannabis cessation</b> for 29% of sample<br>Positive social change = ↑ <b>cannabis cessation</b> for 26% of sample<br>Family, peer, work colleague substance use influence = ↑ <b>cannabis use</b> in 30% of sample<br>↓ Cannabis supply/no money = ↑ <b>cannabis cessation</b> in 13% of sample                                                                                                                                  |
| Lee <i>et al.</i> (2009) <sub>b</sub>    | Individual                             | Past petrol sniffing = ↑ <b>cannabis use</b> vs no petrol sniffing (OR= 3.90, 1.02-15.62)*, ↑ <b>heavy cannabis use</b> vs no petrol sniffing (OR= 4.40, 1.21-15.80)*                                                                                                                                                                                                                                                                                                                                                                                                                                                                                                                                                                                                                                                                                                                                                                                                                                                                                                                                                                                                                                                        |
| Maddox <i>et al.</i> (2015) <sub>a</sub> | Individual<br>Relationship             | Did not complete yr 12 = ↑ <b>tobacco use</b> vs completed yr 12 (OR=21.50, CI 2.91-158.70)**; ↓ SES = ↑ <b>tobacco use</b> (no statistics provided)<br>Friends, family do not smoke = ↑ <b>tobacco abstinence</b> vs peer tobacco use (OR=5.40, CI 1.5-19.1)*; ↑ number of housemates who smoke = ↑ <b>tobacco use</b> (OR=11.80, CI 1.05-132.18)*                                                                                                                                                                                                                                                                                                                                                                                                                                                                                                                                                                                                                                                                                                                                                                                                                                                                          |
| Maksimovic <i>et al.</i> (2013)          | Individual                             | Part-time work = ↑ <b>tobacco cessation</b> *<br>Tobacco use reported as a big expense = ↑ <b>quit using tobacco</b> (no statistics provided)<br>↓ Emotional well-being = ↑ <b>tobacco use</b> *<br>Health prioritization = ↑ <b>tobacco cessation</b> for 50% of quitters<br>Tobacco use reported as "not their thing" = <b>quit using tobacco</b> (no statistics provided)                                                                                                                                                                                                                                                                                                                                                                                                                                                                                                                                                                                                                                                                                                                                                                                                                                                 |

| First author (year)          | Findings Ecological level | Specific results                                                                                                                                                                                                                                                                                                                                                                                                                                                                                                                                                                                                                                                                                                                                                                                                                                                                                                                                                                                                                                                                                                                                                                                                                                                                                                                                                                                                                                                                                                                                                                                                                                                                                                                                                                                                                                                                                                                                                                                                                                                                                                                                                                                                                                                                                                                                                                                                                                                                                                                                                                                                                              |
|------------------------------|---------------------------|-----------------------------------------------------------------------------------------------------------------------------------------------------------------------------------------------------------------------------------------------------------------------------------------------------------------------------------------------------------------------------------------------------------------------------------------------------------------------------------------------------------------------------------------------------------------------------------------------------------------------------------------------------------------------------------------------------------------------------------------------------------------------------------------------------------------------------------------------------------------------------------------------------------------------------------------------------------------------------------------------------------------------------------------------------------------------------------------------------------------------------------------------------------------------------------------------------------------------------------------------------------------------------------------------------------------------------------------------------------------------------------------------------------------------------------------------------------------------------------------------------------------------------------------------------------------------------------------------------------------------------------------------------------------------------------------------------------------------------------------------------------------------------------------------------------------------------------------------------------------------------------------------------------------------------------------------------------------------------------------------------------------------------------------------------------------------------------------------------------------------------------------------------------------------------------------------------------------------------------------------------------------------------------------------------------------------------------------------------------------------------------------------------------------------------------------------------------------------------------------------------------------------------------------------------------------------------------------------------------------------------------------------|
|                              | Relationship              | Falling pregnant = <b>quit using tobacco</b> (no statistics provided)<br>Supportive environment = ↑ <b>tobacco abstinence / cessation*</b> ; positive role models = <b>quit using tobacco</b> (no statistics provided)<br>Family death = <b>quit using tobacco</b> (no statistics provided); shame = <b>quit using tobacco</b> (no statistics provided)<br>Live with a smoker = ↑ <b>tobacco use</b> vs do not live with a smoker (OR=13.71, CI 3.73-50.39)**                                                                                                                                                                                                                                                                                                                                                                                                                                                                                                                                                                                                                                                                                                                                                                                                                                                                                                                                                                                                                                                                                                                                                                                                                                                                                                                                                                                                                                                                                                                                                                                                                                                                                                                                                                                                                                                                                                                                                                                                                                                                                                                                                                                 |
| Noble <i>et al.</i> (2015)   | Individual                | Unemployed = ↑ <b>substance use</b> vs employed (OR= 2.82, CI not specified)*<br>Males = ↑ <b>substance use</b> vs females (OR= 3.11, CI not specified)**<br>55yrs+ = ↓ <b>substance use</b> vs younger than 55yrs (OR= 0.17, CI not specified)**<br>Ever exposed to violence = ↑ <b>substance use</b> vs never exposed to violence (OR= 30.87, CI not specified)**                                                                                                                                                                                                                                                                                                                                                                                                                                                                                                                                                                                                                                                                                                                                                                                                                                                                                                                                                                                                                                                                                                                                                                                                                                                                                                                                                                                                                                                                                                                                                                                                                                                                                                                                                                                                                                                                                                                                                                                                                                                                                                                                                                                                                                                                           |
| Passey <i>et al.</i> 2014    | Individual                | Completed less than yr10 = ↑ <b>2-3 substances use</b> vs completed yr10-11 (OR=3.08, CI 1.52-6.21)*, completed yr12 (OR=11.99, CI 3.27-43.99)*; did not complete post-secondary education = ↑ <b>multiple substances use</b> vs completed post-secondary education (OR=2.81, CI 1.41-5.57)*<br>Tobacco use initiation <15yrs old = ↑ <b>multiple substances use</b> vs tobacco use initiation ≥15yrs old (OR=4.04, CI 1.71-9.58)*; never smoked tobacco (OR=213.46, CI 26.89-1694.61)***, ↑ <b>single substance use</b> vs never smoked tobacco (OR=9.62, CI 3.49-26.53)***; alcohol use initiation <15yrs old = ↑ <b>multiple substances use</b> vs alcohol use initiation ≥15yrs old (OR=4.92, CI 1.90-12.77)*; never drunk alcohol (OR=13.53, CI 4.94-37.07)***; cannabis use initiation <15yrs old = ↑ <b>multiple substances use</b> vs never smoked cannabis (OR=12.93, CI 4.99-33.54)***                                                                                                                                                                                                                                                                                                                                                                                                                                                                                                                                                                                                                                                                                                                                                                                                                                                                                                                                                                                                                                                                                                                                                                                                                                                                                                                                                                                                                                                                                                                                                                                                                                                                                                                                              |
|                              | Community                 | Live in New South Wales = ↑ <b>dual substance use</b> vs live in Northern Territory (OR=2.88, CI 1.43-5.78)**                                                                                                                                                                                                                                                                                                                                                                                                                                                                                                                                                                                                                                                                                                                                                                                                                                                                                                                                                                                                                                                                                                                                                                                                                                                                                                                                                                                                                                                                                                                                                                                                                                                                                                                                                                                                                                                                                                                                                                                                                                                                                                                                                                                                                                                                                                                                                                                                                                                                                                                                 |
| Passey <i>et al.</i> 2012    | Individual                | Completed less than yr10 = ↑ <b>tobacco use</b> vs completed yr10-11 (OR=2.12, CI 1.19-3.75)*, completed yr12 (OR=3.58, CI 1.65-7.79)**; no post-secondary education = ↑ <b>tobacco use</b> vs post-secondary education (OR=1.79, CI 1.08-2.95)*                                                                                                                                                                                                                                                                                                                                                                                                                                                                                                                                                                                                                                                                                                                                                                                                                                                                                                                                                                                                                                                                                                                                                                                                                                                                                                                                                                                                                                                                                                                                                                                                                                                                                                                                                                                                                                                                                                                                                                                                                                                                                                                                                                                                                                                                                                                                                                                              |
| Smirnov <i>et al.</i> (2016) | Individual                | Unemployed = ↑ <b>methamphetamine and opioid dual dependence</b> vs employed (RR= 8.98, CI 2.25-35.82)**<br>Psychological distress = ↑ <b>opioid dependence</b> vs no psychological distress (RR= 2.67, CI 1.09-6.53)*, ↑ <b>methamphetamine and opioid dual dependence</b> vs no psychological distress (RR= 4.86, CI 2.08-11.34)***<br>Incarcerated more than once = ↑ <b>opioid dependence</b> vs never incarcerated (RR= 3.70, CI 1.32-10.41)*, ↑ <b>methamphetamine and opioid dual dependence</b> vs never incarcerated (RR= 3.78, CI 1.43-9.97)**                                                                                                                                                                                                                                                                                                                                                                                                                                                                                                                                                                                                                                                                                                                                                                                                                                                                                                                                                                                                                                                                                                                                                                                                                                                                                                                                                                                                                                                                                                                                                                                                                                                                                                                                                                                                                                                                                                                                                                                                                                                                                      |
| Thomas <i>et al.</i> (2008)  | Individual                | Completed yr 11/12 or non-school qualification = ↑ <b>tobacco abstinence</b> vs completed yr 10 or below (OR=1.60, CI 1.36-1.89)***<br>Unemployed or CDEP = ↓ <b>tobacco abstinence</b> vs not in labor force (OR= 0.76, CI 0.61-0.94)*; employed in public or private sector = ↑ <b>tobacco abstinence</b> vs not in labor force (OR= 2.03, CI 1.64-2.52)***<br>No financial stress (could raise \$2,000 within a week) = ↑ <b>no tobacco use</b> vs high financial stress (could not raise \$2,000 within a week; (OR= 2.33, CI 1.94-2.79)***; 2 <sup>nd</sup> income quintile = ↑ <b>tobacco abstinence</b> vs lowest income quintile (OR= 1.49, CI 1.20-1.85)***; 3 <sup>rd</sup> /4 <sup>th</sup> /highest income quintile = ↑ <b>tobacco abstinence</b> vs lowest income quintile (OR= 2.50, CI 1.96-3.18)***; not receiving Govt. pensions = ↑ <b>tobacco abstinence</b> vs receiving Govt. cash pensions (OR= 2.52, CI 2.09-3.03)***<br>House maintenance/repairs not carried out in last 12mths = ↓ <b>no tobacco use</b> vs no house maintenance (OR= 0.81, CI 0.67-0.99)*; lived in 2+ dwellings in last 12 mths = ↓ <b>no tobacco use</b> vs lived in one dwelling (OR= 0.67, CI 0.54-0.83)***; house owner/purchaser = ↑ <b>tobacco abstinence</b> vs house renter (OR= 2.87, CI 2.36-3.48)***; 1+ Aboriginal and Torres Strait Islander dependents 0-4yrs in household = ↓ <b>tobacco abstinence</b> vs no Aboriginal and Torres Strait Islander dependents 0-4yrs (OR= 0.79, CI 0.66-0.95)*<br>Participated in sport in last 12mths = ↑ <b>tobacco abstinence</b> vs no sporting participation (OR= 1.49, CI 1.22-1.82)***<br>No access to vehicle = ↓ <b>tobacco abstinence</b> vs access to vehicle (OR= 0.50, CI 0.42-0.59)***; perceived difficulty with transport = ↓ <b>tobacco abstinence</b> vs perceived ease of transport (OR= 0.80, CI 0.66-0.96)*; not used computer in last 12mths = ↓ <b>tobacco abstinence</b> vs used computer in last 12mths n (OR= 0.45, CI 0.38-0.53)***; used internet in last 12mths = ↑ <b>tobacco abstinence</b> vs not used internet in last 12mths (OR= 2.35, CI 1.98-2.78)***<br>Psychological stressors not reported in last 12 months = ↑ <b>no tobacco use</b> vs stressors reported (OR= 1.30, CI 1.04-1.63)*<br>Fair/poor health status = ↓ <b>tobacco abstinence</b> vs excellent/very health good status (OR= 0.72, CI 0.53-0.96)*<br>Drank alcohol in past 2wks = ↓ <b>tobacco abstinence</b> vs no alcohol in past 2wks (OR= 0.44, CI 0.36-0.53)***; no alcohol in last 12mths = ↑ <b>tobacco abstinence</b> vs consumed alcohol in last 12mths (OR= 2.36, CI 1.90-2.94)*** |
|                              | Relationship              | Used legal service in last 12mths = ↓ <b>tobacco abstinence</b> vs did not use legal services in last 12mths (OR= 0.53, CI 0.43-0.66)***; arrested in last 5yrs = ↓ <b>tobacco abstinence</b> vs not arrested in last 5yrs (OR=0.40, CI 0.30-0.53)***; incarcerated in last 5yrs = ↓ <b>tobacco abstinence</b> vs not incarcerated in last 5yrs (OR= 0.35, CI 0.30-0.53)***                                                                                                                                                                                                                                                                                                                                                                                                                                                                                                                                                                                                                                                                                                                                                                                                                                                                                                                                                                                                                                                                                                                                                                                                                                                                                                                                                                                                                                                                                                                                                                                                                                                                                                                                                                                                                                                                                                                                                                                                                                                                                                                                                                                                                                                                   |

| First author (year)            | Findings Ecological level                                    | Specific results                                                                                                                                                                                                                                                                                                                                                                                                                                                                                                                                                                                                                                                                                                                                                                                                                                                                                                                                                                                                                                                                                                                                                                                                                                                                                       |
|--------------------------------|--------------------------------------------------------------|--------------------------------------------------------------------------------------------------------------------------------------------------------------------------------------------------------------------------------------------------------------------------------------------------------------------------------------------------------------------------------------------------------------------------------------------------------------------------------------------------------------------------------------------------------------------------------------------------------------------------------------------------------------------------------------------------------------------------------------------------------------------------------------------------------------------------------------------------------------------------------------------------------------------------------------------------------------------------------------------------------------------------------------------------------------------------------------------------------------------------------------------------------------------------------------------------------------------------------------------------------------------------------------------------------|
|                                | Community Societal                                           | Not involved in social activities in last 3mths = ↓ <b>tobacco abstinence</b> vs involved in social activities (OR= 0.72, CI 0.54-0.97)*; not have support in time of crisis = ↓ <b>tobacco abstinence</b> vs support (OR= 0.59, CI 0.42, 0.83)**<br>Victim of physical or threatened violence in last 12mths = ↓ <b>tobacco abstinence</b> vs not a victim of physical or threatened violence (OR= 0.56, CI 0.45-0.69)***<br>Remote males = ↓ <b>tobacco abstinence</b> vs non-remote males (OR= 0.66, CI 0.54-0.80)*; remote = ↑ <b>tobacco abstinence</b> vs non-remote (OR= 1.25, CI 1.06-1.48)**<br>Person removed from natural family = ↓ <b>tobacco abstinence</b> vs person removed from family (OR= 0.46, CI 0.32-0.66)***                                                                                                                                                                                                                                                                                                                                                                                                                                                                                                                                                                    |
| Thrift <i>et al.</i> (2011)    | Individual Community                                         | Low SES = ↑ <b>tobacco use</b> during pregnancy vs high SES (OR= 2.64, CI 2.22-3.14)*<br>Low SES rural = ↑ <b>tobacco use</b> during pregnancy vs high SES rural (OR= 1.54, CI 1.03-2.32)*; low SES urban = ↑ <b>tobacco use</b> during pregnancy vs high SES urban (OR= 2.69, CI 2.20-3.29)*                                                                                                                                                                                                                                                                                                                                                                                                                                                                                                                                                                                                                                                                                                                                                                                                                                                                                                                                                                                                          |
| <b>Qualitative n=13</b>        |                                                              |                                                                                                                                                                                                                                                                                                                                                                                                                                                                                                                                                                                                                                                                                                                                                                                                                                                                                                                                                                                                                                                                                                                                                                                                                                                                                                        |
| Bond <i>et al.</i> (2012)      | Individual<br>Relationship<br>Community<br>Societal          | ↑ Stress = ↑ <b>tobacco use</b> ; ↑ negative life events = ↑ <b>tobacco use</b><br>Personal health crisis = ↑ <b>tobacco cessation</b><br>↓ Self-esteem = ↑ <b>tobacco use</b> ; ↑ positive self-concept, self-esteem, self-efficacy = ↑ <b>tobacco cessation</b> ; ↑ resilience strategies = ↑ <b>tobacco cessation</b> ;<br>positive change in identity after major life milestone = ↑ <b>tobacco cessation</b> ; personal ownership/control over decision making process = ↑ <b>tobacco cessation</b><br>Positive life event = ↑ <b>tobacco cessation</b><br>Supportive environment = ↑ <b>tobacco cessation</b> ; health care provider as integral support person = ↑ <b>tobacco cessation</b><br>Negative social stigma about smoking = ↑ guilt = <b>reinforced tobacco use</b><br>Workplace where smoking behaviors are not supported implicitly or explicitly = ↑ <b>tobacco abstinence/ cessation</b><br>Westernized health promotion = <b>continued tobacco use + ↑ tobacco prevalence within community</b> . Symbolic of colonial assertions and power over Aboriginal and Torres Strait Islander people<br>Promotion of increased risk of illness and premature death = <b>no change in tobacco use</b> . Aboriginal and Torres Strait Islander ill-health viewed as pre-determined reality |
| Dawson <i>et al.</i> (2012)    | Individual<br>Relationship<br>Community<br>Cultural Societal | ↑ Grief and loss = <b>continued tobacco use</b> + obstacle to quitting smoking; ↑ stress = <b>continued tobacco use</b> + obstacle to quitting smoking; fear = <b>continued tobacco use</b> + obstacle to quitting smoking<br>↓ Knowledge of tobacco effects = <b>continued tobacco use</b> ; scarcity of resources for quitting smoking = <b>continued tobacco use</b><br>↓ Support and no positive role models = ↑ <b>tobacco use</b><br>Pressure to quit smoking = feeling of being “picked on” = ↑ <b>tobacco use</b> ; unwanted attention (well-wishes) during quit attempt = reminds individual about tobacco = ↑ <b>tobacco use relapse</b><br>Social pressure to smoke = ↑ <b>tobacco use</b><br>Living with smokers = ↑ <b>tobacco use</b><br>Tobacco use accepted and common in the workplace = ↑ <b>tobacco use</b><br>↓ Tobacco use = ↑ social exclusion = ↑ <b>tobacco use</b> to fit in<br>Bush tobacco has pivotal role in traditional Aboriginal and Torres Strait Islander society = ↑ acceptability of <b>tobacco use</b><br>↓ Smoke-free policies = <b>barrier to quitting tobacco use</b> ; ↓ short-term tobacco program funding = <b>barrier to quitting tobacco use</b>                                                                                                          |
| Gamarania <i>et al.</i> (1998) | Individual<br>Relationship                                   | Perception that they are too young = ↑ <b>no tobacco use</b><br>↑ Knowledge of adverse health effects = ↑ <b>tobacco abstinence/cessation</b><br>Enjoy smoking tobacco = ↑ <b>tobacco use</b> ; do not enjoy smoking tobacco = <b>no tobacco use</b> ; fear of getting in trouble = <b>no tobacco use</b> ; not wanting to become thin = <b>no tobacco use</b><br>Peer tobacco use = ↑ <b>tobacco use</b> ; peer pressure to smoke = ↑ <b>tobacco use</b> ; family does not smoke = <b>no tobacco use</b>                                                                                                                                                                                                                                                                                                                                                                                                                                                                                                                                                                                                                                                                                                                                                                                              |
| Gould <i>et al.</i> (2017)     | Individual                                                   | Having one's own money = ↑ <b>regular tobacco use</b><br>Turning 18 years = ↑ <b>tobacco use</b><br>Cannabis use = ↑ <b>tobacco use</b><br>Pregnancy, feeling nauseous, breastfeeding = ↑ <b>tobacco cessation</b><br>Baby transitioning to bottle feeding = ↑ <b>tobacco use relapse</b>                                                                                                                                                                                                                                                                                                                                                                                                                                                                                                                                                                                                                                                                                                                                                                                                                                                                                                                                                                                                              |



| First author (year)           | Findings Ecological level | Specific results                                                                                                                                                                                                                                                                                                                                                                                                                                                                                                                                                                                                                                                                                                                                                                                                                             |
|-------------------------------|---------------------------|----------------------------------------------------------------------------------------------------------------------------------------------------------------------------------------------------------------------------------------------------------------------------------------------------------------------------------------------------------------------------------------------------------------------------------------------------------------------------------------------------------------------------------------------------------------------------------------------------------------------------------------------------------------------------------------------------------------------------------------------------------------------------------------------------------------------------------------------|
|                               | Relationship              | Depression = ↑ <b>tobacco use</b> ; negative stressors = ↑ <b>tobacco use</b><br>Peer tobacco use = ↑ <b>tobacco use relapse</b> ; peer pressure to use tobacco = ↑ <b>tobacco use</b> ; parent tobacco use = ↑ tobacco accessibility = ↑ <b>tobacco use</b><br>Non-smoking mothers = ↑ <b>tobacco abstinence</b>                                                                                                                                                                                                                                                                                                                                                                                                                                                                                                                            |
| Johnston <i>et al.</i> (2008) | Individual                | Unemployment = ↑ <b>tobacco use</b><br>↓ SES = ↑ <b>tobacco use</b><br>↑ Stress = ↑ <b>tobacco use relapse</b> , females > males<br>↑ Resilience and determination = ↑ <b>tobacco abstinence</b><br>Enjoy smoking tobacco = ↑ <b>tobacco use</b>                                                                                                                                                                                                                                                                                                                                                                                                                                                                                                                                                                                             |
|                               | Relationship              | Positive family relationship = ↑ <b>tobacco cessation</b> ; positive role models (non-smoking parents, grandparents) = ↑ <b>tobacco abstinence</b><br>Exposure to family smoking practices = ↑ <b>tobacco initiation</b> ; model adult smoking behavior = ↑ <b>tobacco initiation</b> ; peer tobacco use = ↑ <b>tobacco initiation</b> ; partner tobacco use = ↑ <b>tobacco initiation</b> ; community tobacco use = ↑ <b>tobacco initiation</b> ; social pressure to smoke = ↑ <b>tobacco use</b><br>↑ No. of smokers in house = ↑ <b>tobacco use</b>                                                                                                                                                                                                                                                                                       |
|                               | Cultural                  | Sharing tobacco as cultural ritual = sense of belonging and social cohesiveness = ↑ <b>tobacco use</b> ; smoking as behavior passed down through generations = ↑ <b>tobacco use</b> ; tobacco as commodity for social exchange = <b>reinforces tobacco use</b> ; observe general community using tobacco = tobacco use as socially acceptable = ↑ <b>tobacco use</b><br>↑ Intergenerational trauma = breakdown of more traditional lifestyles = ↑ <b>problem tobacco use</b><br>Unregulated access to tobacco = ↑ <b>tobacco use</b>                                                                                                                                                                                                                                                                                                         |
| Johnston <i>et al.</i> (2012) | Individual                | Alcohol use = ↑ <b>tobacco use</b> ; cannabis use = ↑ <b>tobacco use</b><br>Portray an image of being “rebellious”, “cool”, or “grown up” = ↑ <b>tobacco initiation</b> ; smoking perceived as “gross” or “disgusting” = <b>no tobacco use</b>                                                                                                                                                                                                                                                                                                                                                                                                                                                                                                                                                                                               |
|                               | Relationship              | Reinforcing messages from family/peers against tobacco use + negative physiological effects from first puff = ↑ <b>tobacco cessation</b> ; ↑ anti-smoking socialization = ↑ <b>tobacco abstinence</b> ; direct role models = ↑ <b>tobacco abstinence</b> ; clear and communicated consequences to smoking = ↑ <b>tobacco abstinence</b><br>Acquiring tobacco from family members = ↑ <b>tobacco experimentation</b> ; overt pressure to smoke from relative = ↑ <b>tobacco experimentation</b> ; social pressure to smoke during high school years = ↑ <b>tobacco experimentation and use</b> ; family networks teaching youth how to smoke (roll cigarette, ‘light up’) = ↑ <b>tobacco initiation</b> ; peer, community tobacco use = ↑ <b>tobacco use</b> ; not smoking around children = ↑ <b>tobacco abstinence</b> among those children |
|                               | Community                 | Live with a smoker = ↑ tobacco exposure and availability = ↓ <b>tobacco use initiation age</b> ; smoke-free indoor spaces within home = ↑ <b>tobacco abstinence</b><br>↑ Tobacco availability in home = ↑ <b>tobacco use</b><br>Remote living = ↑ <b>tobacco use</b>                                                                                                                                                                                                                                                                                                                                                                                                                                                                                                                                                                         |
|                               | Cultural                  | ↓ Tobacco access = ↑ <b>tobacco abstinence</b> ; ↓ perceived tobacco prevalence = ↓ <b>tobacco use</b> in the community<br>Smokers feel marginalized by the wider school community = seek out other smokers to normalize behavior = reinforce tobacco use = ↑ <b>tobacco use intensity</b><br>Share tobacco with relatives while socializing = reinforces behavior to smoke = ↑ <b>tobacco use</b> ; high prevalence of tobacco among families = tobacco normalization = ↑ <b>tobacco experimentation</b> ; in remote settings, smoking in families is normative = ↑ <b>tobacco use</b> ; peer socialization = indirect pressure to conform to social norms = ↑ <b>tobacco experimentation</b>                                                                                                                                               |
|                               | Societal                  | ↑ Tobacco restrictions (smoke-free areas, graphic pack warnings) = ↓ <b>tobacco use</b>                                                                                                                                                                                                                                                                                                                                                                                                                                                                                                                                                                                                                                                                                                                                                      |
| Leavy <i>et al.</i> (2010)    | Individual                | ↑ Boredom = ↑ <b>tobacco use</b><br>Chronic problems in life = ↑ <b>tobacco use</b> ; ↑ stress = ↑ <b>tobacco use</b>                                                                                                                                                                                                                                                                                                                                                                                                                                                                                                                                                                                                                                                                                                                        |
|                               | Relationship              | Peer tobacco use = ↑ <b>tobacco use</b> ; peer pressure to smoke = ↑ <b>tobacco use</b>                                                                                                                                                                                                                                                                                                                                                                                                                                                                                                                                                                                                                                                                                                                                                      |
|                               | Cultural                  | Tobacco experimentation as normal part of some teenager’s trajectory = ↑ <b>tobacco experimentation</b>                                                                                                                                                                                                                                                                                                                                                                                                                                                                                                                                                                                                                                                                                                                                      |
| MacLean <i>et al.</i> (2017)  | Individual                | Trauma through other substance use = ↑ <b>crystal methamphetamine use</b>                                                                                                                                                                                                                                                                                                                                                                                                                                                                                                                                                                                                                                                                                                                                                                    |
|                               | Relationship              | Trauma through family conflict = ↑ <b>crystal methamphetamine use</b><br>Enjoy the social experience of using with other people = ↑ <b>crystal methamphetamine use</b><br>Desire to reconnect with family = ↑ <b>crystal methamphetamine cessation</b>                                                                                                                                                                                                                                                                                                                                                                                                                                                                                                                                                                                       |
|                               | Community                 | ↓ Social opportunities in regional communities = ↑ <b>crystal methamphetamine use</b>                                                                                                                                                                                                                                                                                                                                                                                                                                                                                                                                                                                                                                                                                                                                                        |

| First author (year)                      | Findings Ecological level                           | Specific results                                                                                                                                                                                                                                                                                                                                                                                                                                                                                                                                                                                                                                                                                                                                                                                                                                                                                                                                                                                                                                                                                                                                                                                                                                                                                                                                                                                                                                                                                                                                                                                                                                                                                                                                                                                         |
|------------------------------------------|-----------------------------------------------------|----------------------------------------------------------------------------------------------------------------------------------------------------------------------------------------------------------------------------------------------------------------------------------------------------------------------------------------------------------------------------------------------------------------------------------------------------------------------------------------------------------------------------------------------------------------------------------------------------------------------------------------------------------------------------------------------------------------------------------------------------------------------------------------------------------------------------------------------------------------------------------------------------------------------------------------------------------------------------------------------------------------------------------------------------------------------------------------------------------------------------------------------------------------------------------------------------------------------------------------------------------------------------------------------------------------------------------------------------------------------------------------------------------------------------------------------------------------------------------------------------------------------------------------------------------------------------------------------------------------------------------------------------------------------------------------------------------------------------------------------------------------------------------------------------------|
|                                          | Cultural Societal                                   | <p>↓ Recreational options = ↑ <b>crystal methamphetamine use</b></p> <p>Selling crystal methamphetamine = ↑ availability = ↑ <b>crystal methamphetamine use</b></p> <p>↑ Connection to culture and to Country = ↑ <b>crystal methamphetamine cessation</b></p> <p>↑ Intergenerational trauma = ↑ <b>crystal methamphetamine use</b></p> <p>↑ Punitive social policies towards Aboriginal people = ↑ <b>crystal methamphetamine use</b></p> <p>↑ Racism towards Aboriginal people = ↑ <b>crystal methamphetamine use</b></p> <p>↑ Social disadvantage towards Aboriginal people = gangs target Aboriginal people to commence dealing = ↑ availability = ↑ <b>crystal methamphetamine use</b></p>                                                                                                                                                                                                                                                                                                                                                                                                                                                                                                                                                                                                                                                                                                                                                                                                                                                                                                                                                                                                                                                                                                          |
| Maddox <i>et al.</i> (2015) <sup>a</sup> | Community Cultural                                  | <p>↓ Awareness and access to smoking cessation services = ↑ <b>tobacco use</b> (no statistics provided)</p> <p>Normalization of tobacco use among Aboriginal people = ↑ <b>tobacco use</b> (no statistics provided)</p> <p>↑ tobacco availability = ↑ <b>tobacco use</b> (no statistics provided)</p>                                                                                                                                                                                                                                                                                                                                                                                                                                                                                                                                                                                                                                                                                                                                                                                                                                                                                                                                                                                                                                                                                                                                                                                                                                                                                                                                                                                                                                                                                                    |
| Passey <i>et al.</i> (2011)              | Individual Relationship Community Cultural Societal | <p>Success in school = ↓ <b>tobacco early initiation</b>; completed above year 10 = ↓ <b>tobacco early initiation</b></p> <p>Lack of routine among unemployed adolescents = ↑ <b>tobacco initiation</b></p> <p>↓ Opportunities = ↑ boredom = ↑ <b>tobacco initiation</b>; ↑ Sport and recreational activities = ↓ <b>tobacco use</b></p> <p>Smoking symbolic of 'adult behavior' for females = ↑ <b>tobacco initiation</b></p> <p>↑ Stress = ↑ <b>tobacco use</b></p> <p>Portray an image of being "cooler", or "grown up" = ↑ <b>tobacco initiation</b></p> <p>Positive non-smoking role models = ↓ <b>tobacco initiation</b>; ↑ anti-smoking parental advice = ↓ <b>tobacco initiation</b></p> <p>Peer, family tobacco use = ↑ <b>tobacco initiation</b>; desire to fit in with friends and belong to group = ↑ <b>tobacco initiation</b>; ↑ non-smoking friends who disapproved of smoking = ↓ <b>tobacco initiation</b></p> <p>Large and fluid households with people coming and going + shared child-raising + high smoking prevalence among members = ↑ <b>tobacco initiation</b> among youth</p> <p>↑ Tobacco availability = ↑ <b>tobacco use</b></p> <p>Cultural obligation to accept and share tobacco (contributes to sense of belonging) = ↑ <b>tobacco use</b>; ↑ prevalence of tobacco use in Aboriginal and Torres Strait Islander networks = ↑ perception that tobacco use is normal and part of Aboriginal identity = ↑ <b>tobacco use</b>; ↑ prevalence of tobacco use in Aboriginal and Torres Strait Islander networks = ↑ perception that tobacco use is normal and part of Aboriginal identity = ↑ <b>tobacco use</b>; tobacco use expected as normal part of teenager's trajectory = ↑ <b>tobacco experimentation</b></p> <p>↑ Intergenerational trauma = ↑ <b>tobacco use</b></p> |
| Senior <i>et al.</i> (2006)              | Individual Relationship Community                   | <p>↑ Boredom = ↑ <b>petrol sniffing</b></p> <p>↑ Inner conflict from living between two cultures = ↑ <b>petrol use</b></p> <p>Peer pressure to sniff petrol = ↑ <b>petrol sniffing</b>, remote/rural &gt; non-remote</p> <p>Overcrowded housing = ↓ privacy = ↑ <b>petrol sniffing</b></p> <p>Opal fuel introduction = ↑ <b>petrol sniffing cessation</b></p>                                                                                                                                                                                                                                                                                                                                                                                                                                                                                                                                                                                                                                                                                                                                                                                                                                                                                                                                                                                                                                                                                                                                                                                                                                                                                                                                                                                                                                            |
| Tsourtos <i>et al.</i> (2015)            | Individual Relationship Cultural                    | <p>↑ Education level = ↑ <b>tobacco abstinence</b></p> <p>↑ Stress = ↑ <b>tobacco use</b>, ↑ <b>tobacco use relapse</b>; ↑ distractions, distancing self from stressor = ↓ perceived level of stress = ↑ <b>tobacco abstinence</b>; ↑ problem solving skills, making decisions = ↑ ability to remove stressor = ↑ <b>tobacco abstinence</b></p> <p>Transition point in life (often health related) = ↑ <b>tobacco cessation</b></p> <p>↑ Determination, resoluteness, confidence, being in control, self-respect attributes = ↑ <b>tobacco cessation</b>; ↑ problem solving, making decisive decisions (to remove stressors) = ↑ <b>tobacco abstinence</b></p> <p>Supportive environment (friends/family/community) = ↑ <b>tobacco cessation</b></p> <p>Encouragement from others to smoke = ↑ <b>tobacco use</b></p> <p>↑ Tobacco use as social norm = ↑ <b>tobacco use</b></p>                                                                                                                                                                                                                                                                                                                                                                                                                                                                                                                                                                                                                                                                                                                                                                                                                                                                                                                         |
| Wood, <i>et al.</i> (2008)               | Individual                                          | <p>Unemployment = ↑ <b>tobacco use</b>, ↑ mental and physical occupation = ↑ <b>tobacco abstinence/ cessation</b></p> <p>↑ Stress and difficult life circumstances = ↑ <b>tobacco use</b>, ↑ <b>tobacco use relapse</b></p>                                                                                                                                                                                                                                                                                                                                                                                                                                                                                                                                                                                                                                                                                                                                                                                                                                                                                                                                                                                                                                                                                                                                                                                                                                                                                                                                                                                                                                                                                                                                                                              |

| First author (year) | Findings Ecological level | Specific results                                                                                                                                                                                                                                                                                             |
|---------------------|---------------------------|--------------------------------------------------------------------------------------------------------------------------------------------------------------------------------------------------------------------------------------------------------------------------------------------------------------|
|                     |                           | Smoking is a low health priority = ↑ <b>tobacco use</b>                                                                                                                                                                                                                                                      |
|                     | Relationship              | Teenage pregnancy = ↑ <b>tobacco use</b> ; single motherhood = ↑ <b>tobacco use</b><br>Supportive environment (family/peers) = ↑ <b>tobacco abstinence/ cessation</b><br>Yarning = ↑ <b>tobacco use</b> ; peer, community tobacco use = ↑ <b>tobacco use</b>                                                 |
|                     | Cultural                  | Smoking seen as normal and accepted behaviors = ↑ <b>tobacco use</b> , ↓ <b>tobacco cessation efforts</b> , ↑ tobacco rations provided during colonization = ↑ number of Aboriginal and Torres Strait Islander tobacco users = ↑ normalization of tobacco use = ↑ continued prevalence of <b>tobacco use</b> |

\*  $p < 0.05$ , 95% confidence interval, \*\*  $p < 0.01$ , \*\*\*  $p < 0.001$ , a Maddox et al. 2015 reported both quantitative and qualitative data, b longitudinal study. OR:

odds ratio; RR: risk ratio; SES: socio-economic status; NR: not reported; CDEP: Community development employment programs

**Supplementary Figure 1a:** Odds ratios of age and gender associated with tobacco, alcohol, cannabis and other substance use and related harms amongst Aboriginal and Torres Strait Islander people.

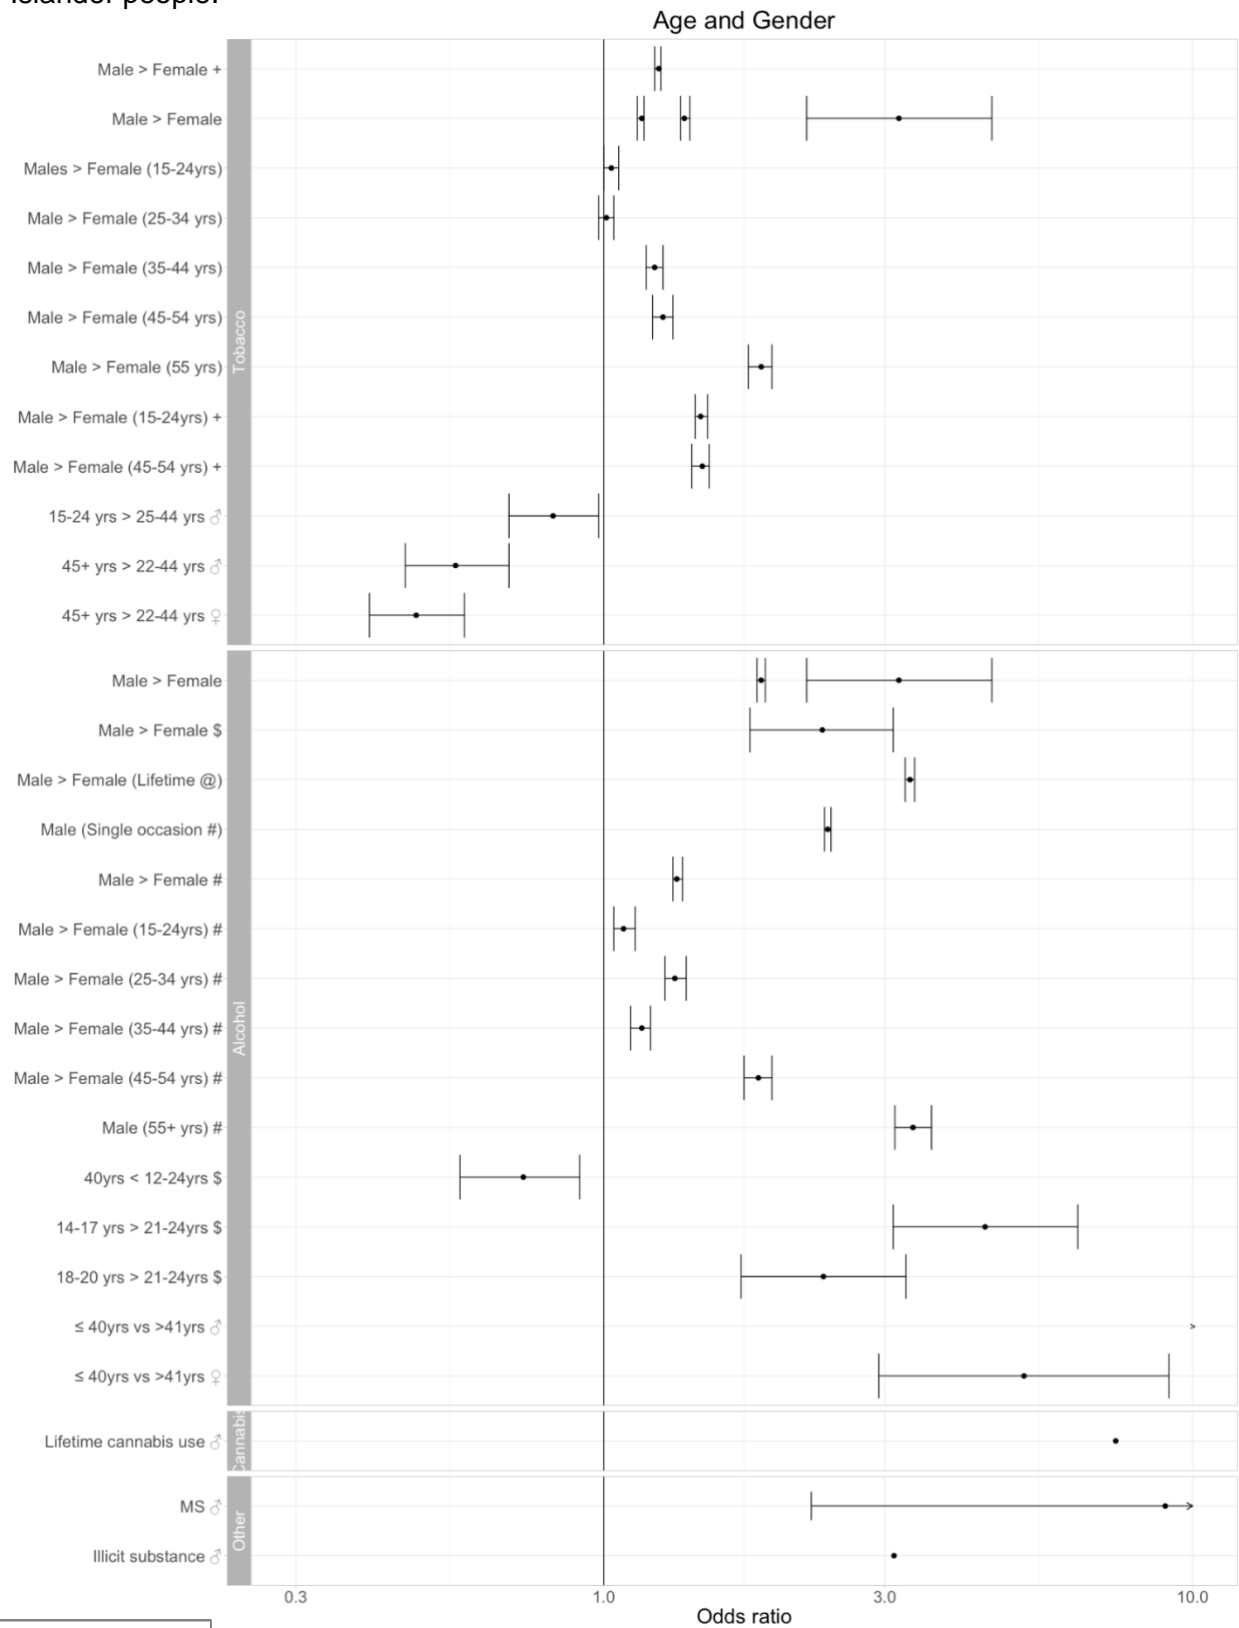

~ abstinence  
 ^ use in pregnancy  
 C problems in community  
 O opioid use  
 M+O methamphetamine and opioid use  
 PS petrol sniffing  
 MS multiple substance use  
 + daily use  
 # risk use  
 @ - initiation  
 \$ repeat drink driving offence

**Supplementary Figure 1b:** Odds ratios of mental and physical health and lifestyle factors associated with tobacco, alcohol cannabis and other substance use and related harms amongst Aboriginal and Torres Strait Islander people.

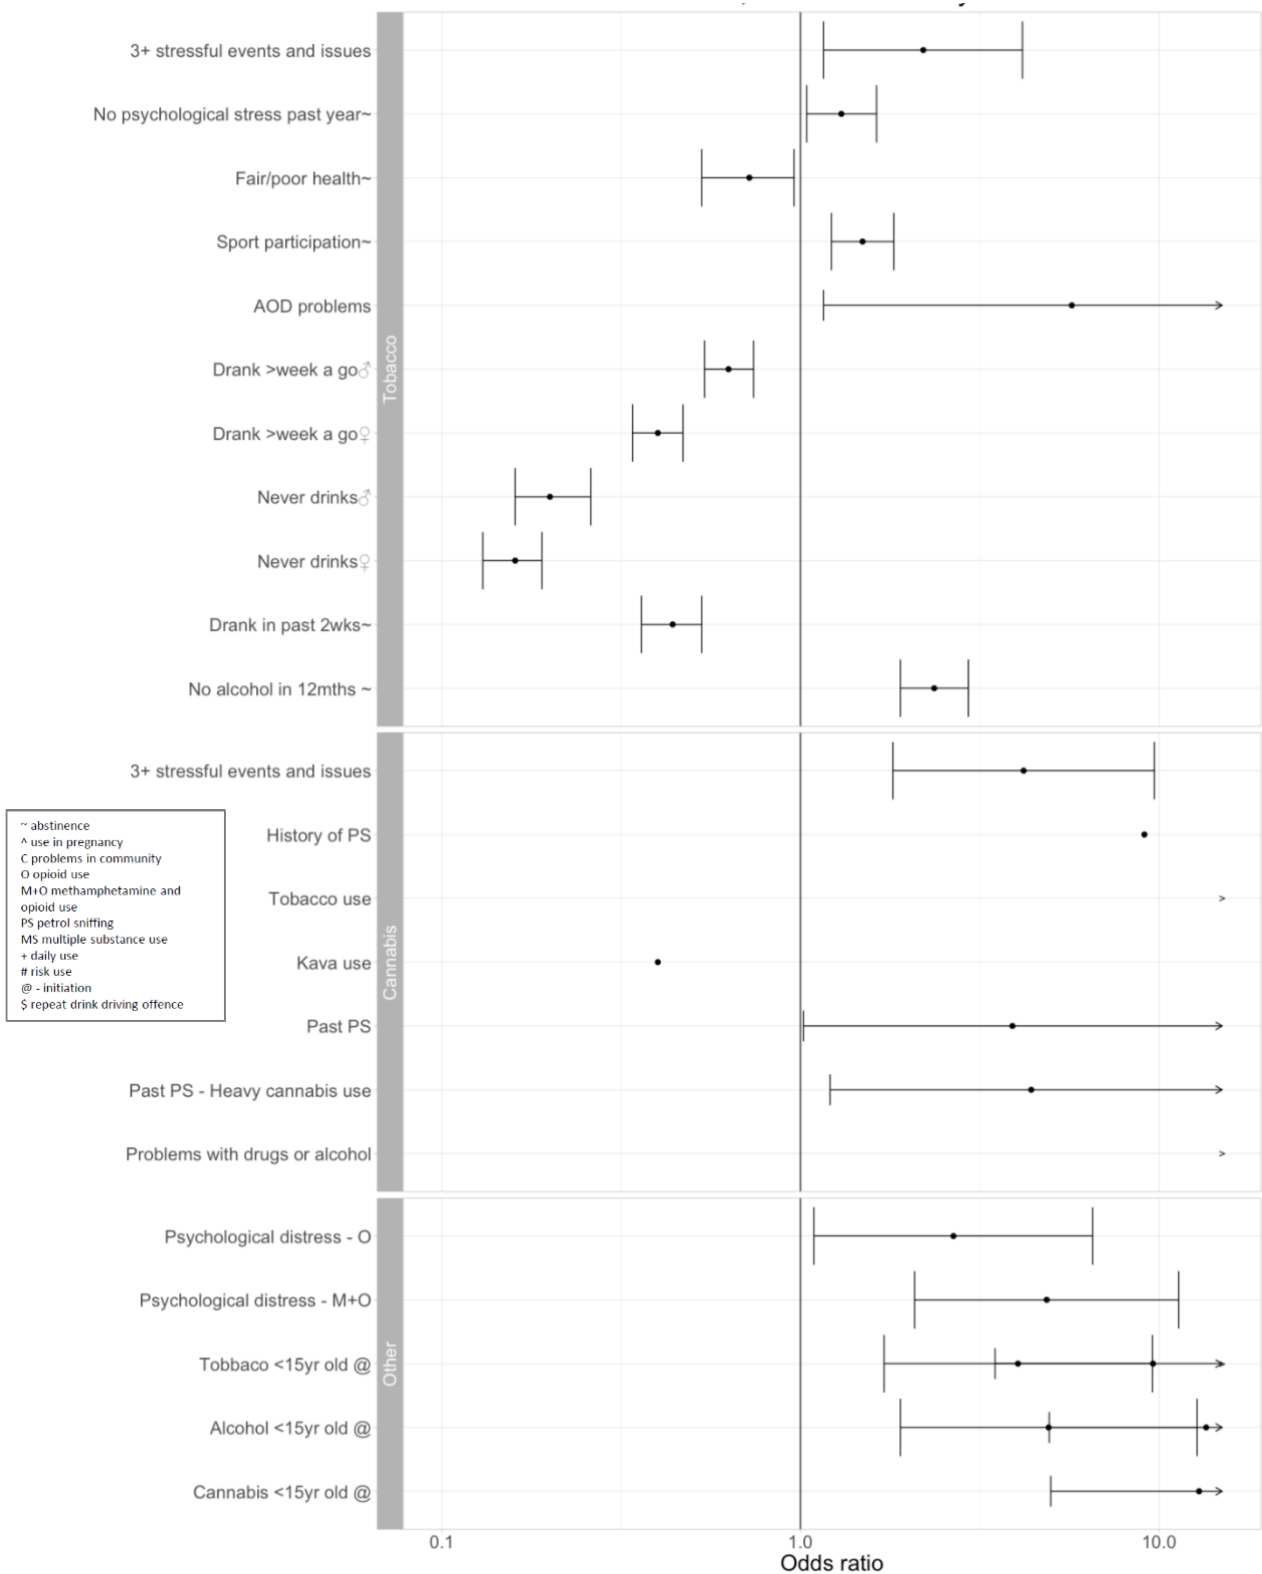

**Supplementary Figure 1c:** Odds ratios of education and employment factors associated with tobacco, alcohol cannabis and other substance use and related harms amongst Aboriginal and Torres Strait Islander people.

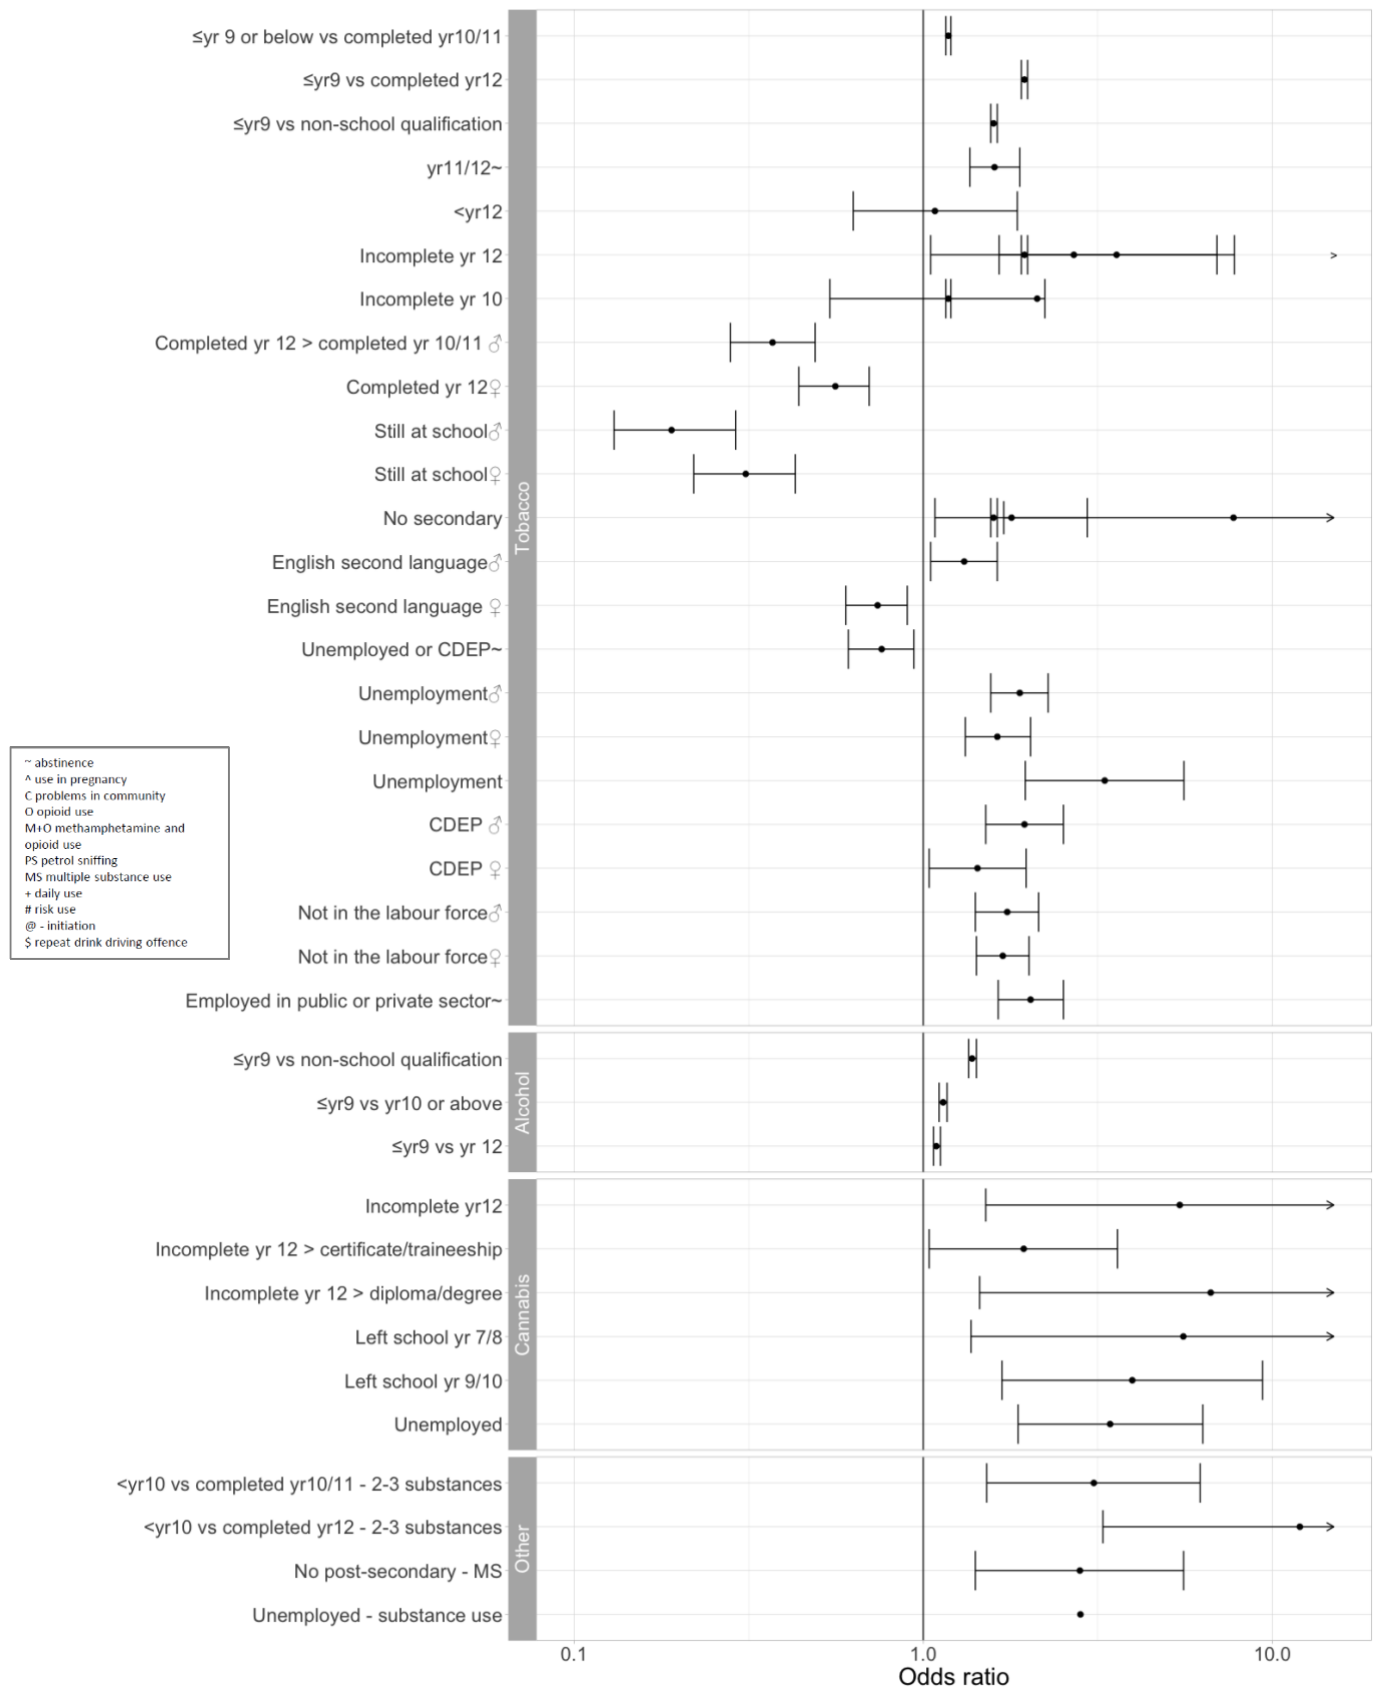

**Supplementary Figure 1d:** Odds ratios of other socioeconomic status factors associated with tobacco, alcohol cannabis and other substance use and related harms amongst Aboriginal and Torres Strait Islander people.

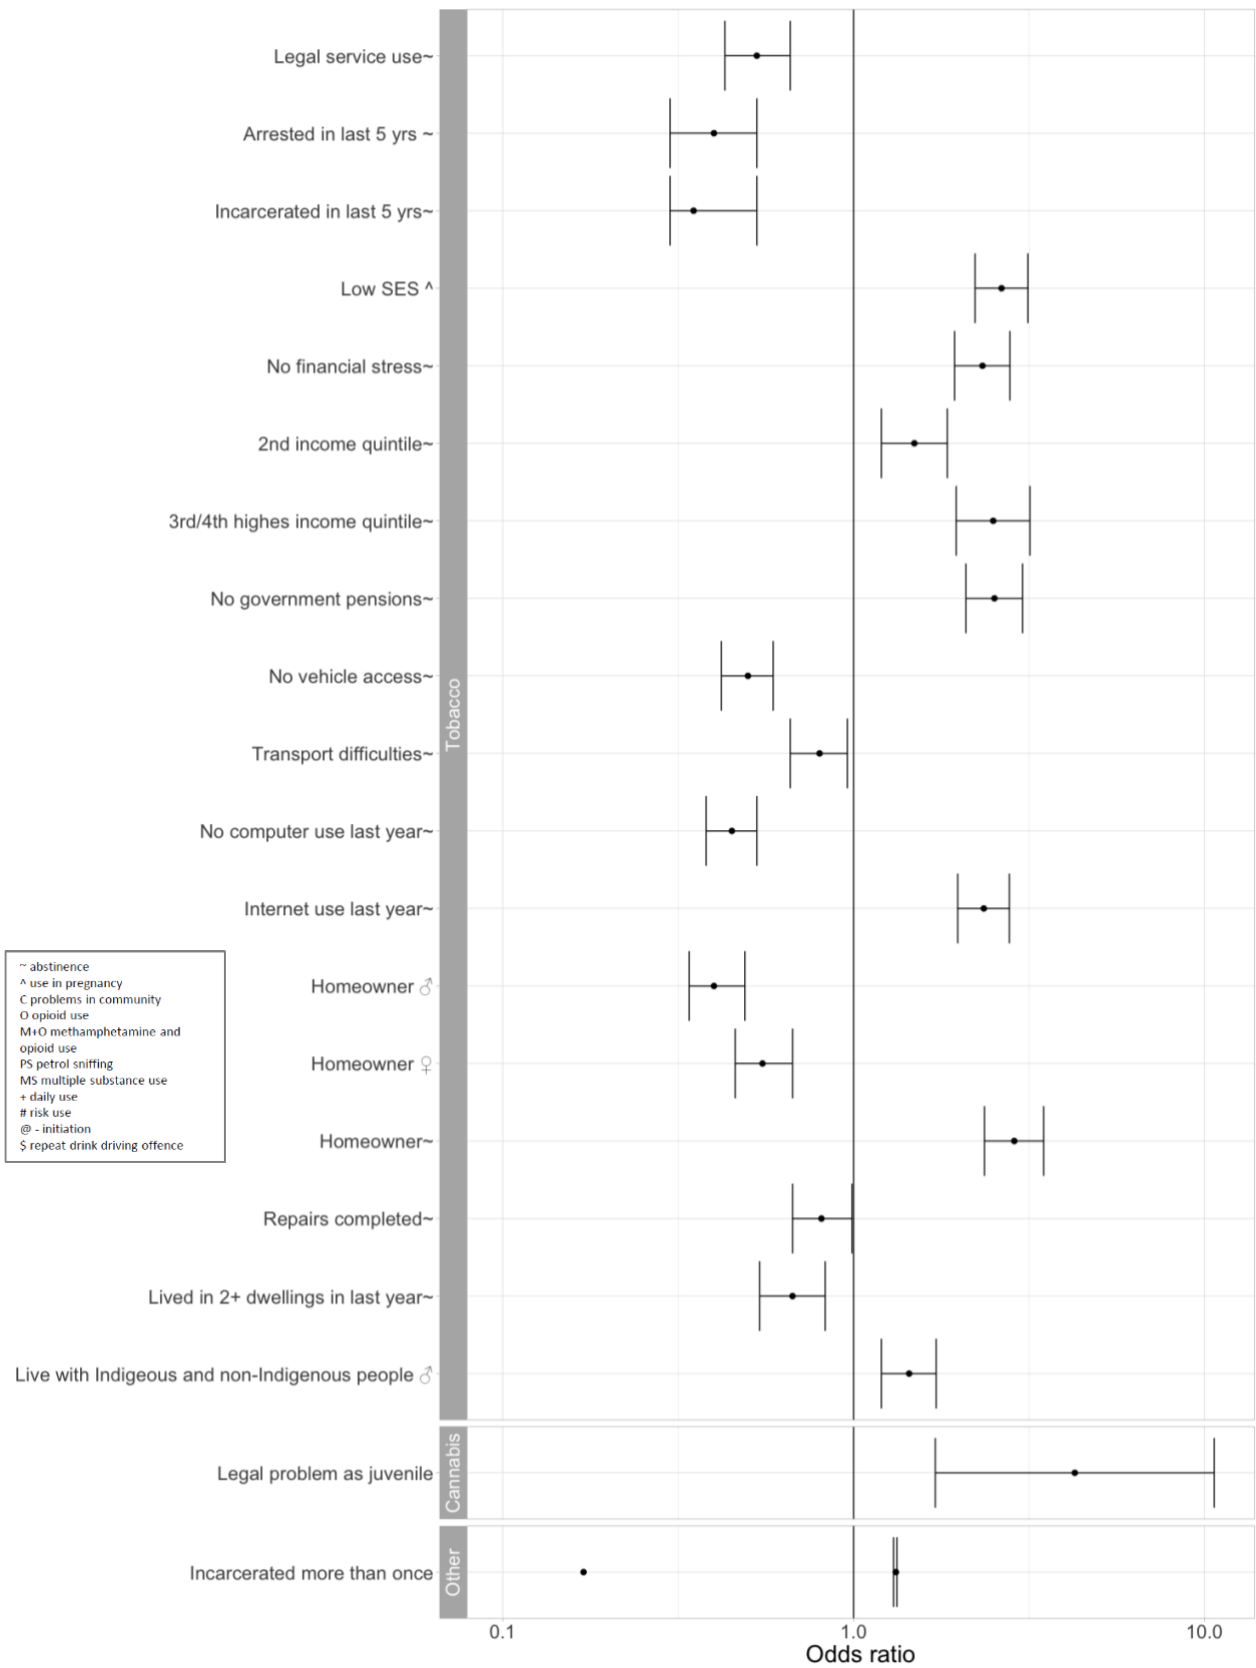

**Supplementary Figure 2:** Odds ratios of relationship factors associated with tobacco, alcohol cannabis and other substance use and related harms amongst Aboriginal and Torres Strait Islander people

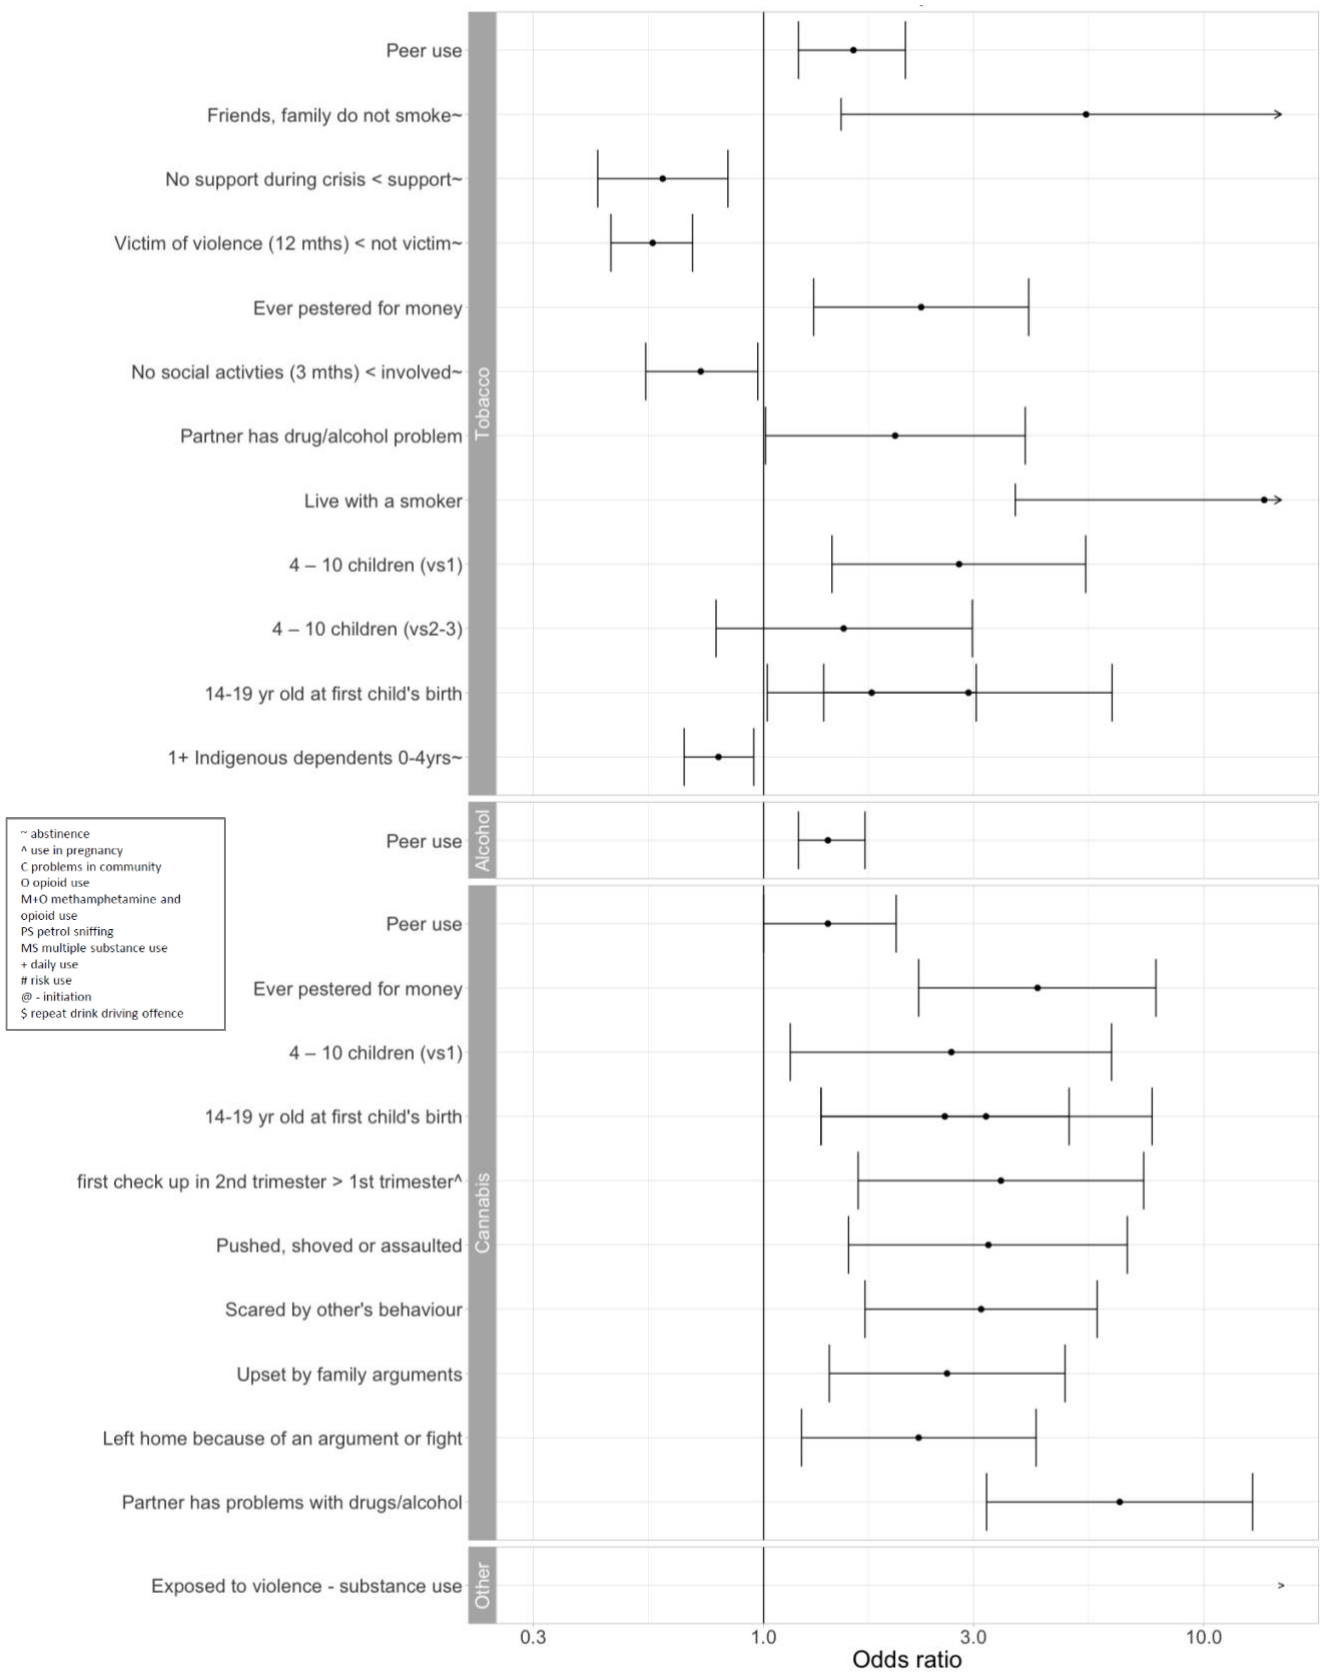



**Supplementary Figure 3:** Odds ratios of community factors associated with tobacco, alcohol cannabis and other substance use and related harms amongst Aboriginal and Torres Strait Islander people.

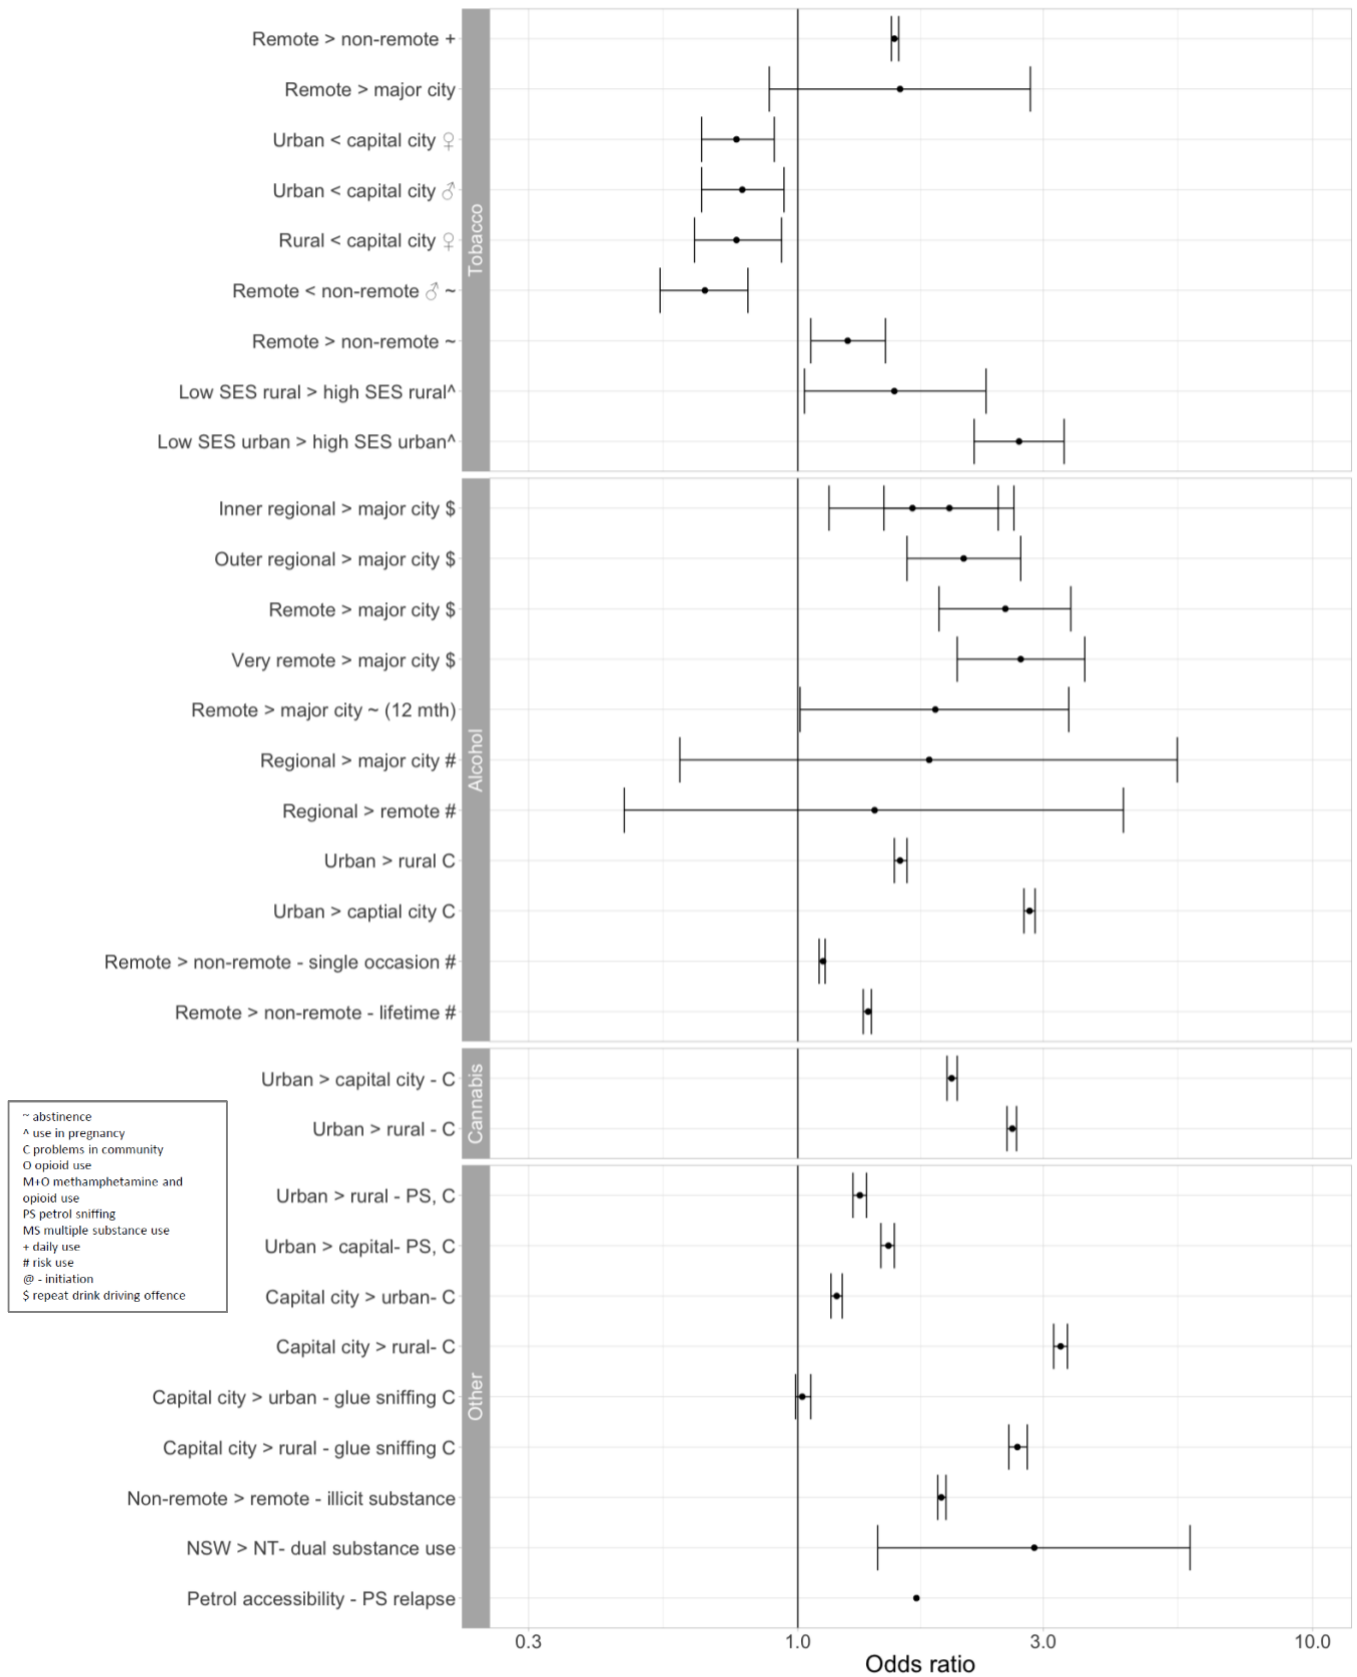

**Supplementary Figure 4:** Odds ratios of culturally distinct and societal factors associated with tobacco and alcohol use and related harms amongst Aboriginal and Torres Strait Islander people.

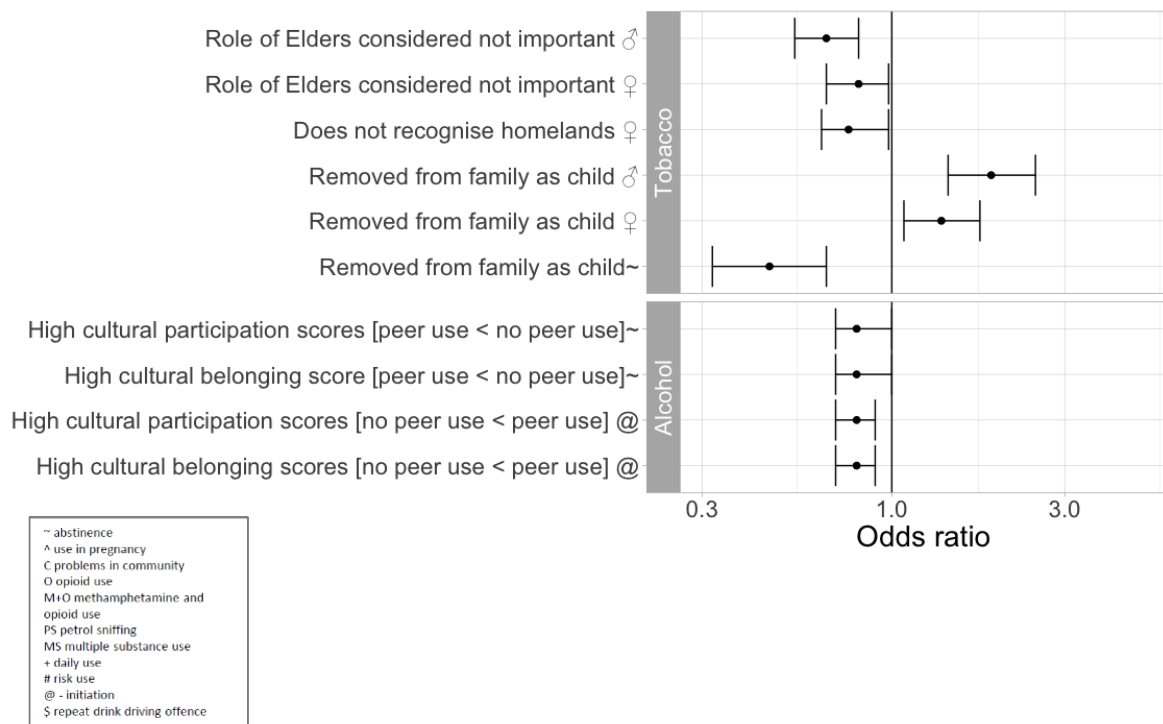

Supplement: mmc1.pdf [file mmc1.pdf]
